# Supplementary material for: Synthesis of a sucrose-based macrocycle with unsymmetrical monosaccharides "arms"
Source: publisher site journal article supplement (doi:10.3762/bjoc.14.50), 2018-03-15
Supplement: Additional file 1 [file 1860-5397-14-50-S1.pdf]

**Supporting Information**

**for**

**Synthesis of a sucrose-based macrocycle with unsymmetrical monosaccharides "arms"**

Karolina Tiara, Mykhaylo A. Potopnyk and Sławomir Jarosz\*

Address: Institute of Organic Chemistry, Polish Academy of Sciences, Kasprzaka 44/52, 01-224 Warsaw, Poland

Email: Sławomir Jarosz - [slawomir.jarosz@icho.edu.pl](mailto:slawomir.jarosz@icho.edu.pl)

\*Corresponding author

**Copies of NMR spectra**

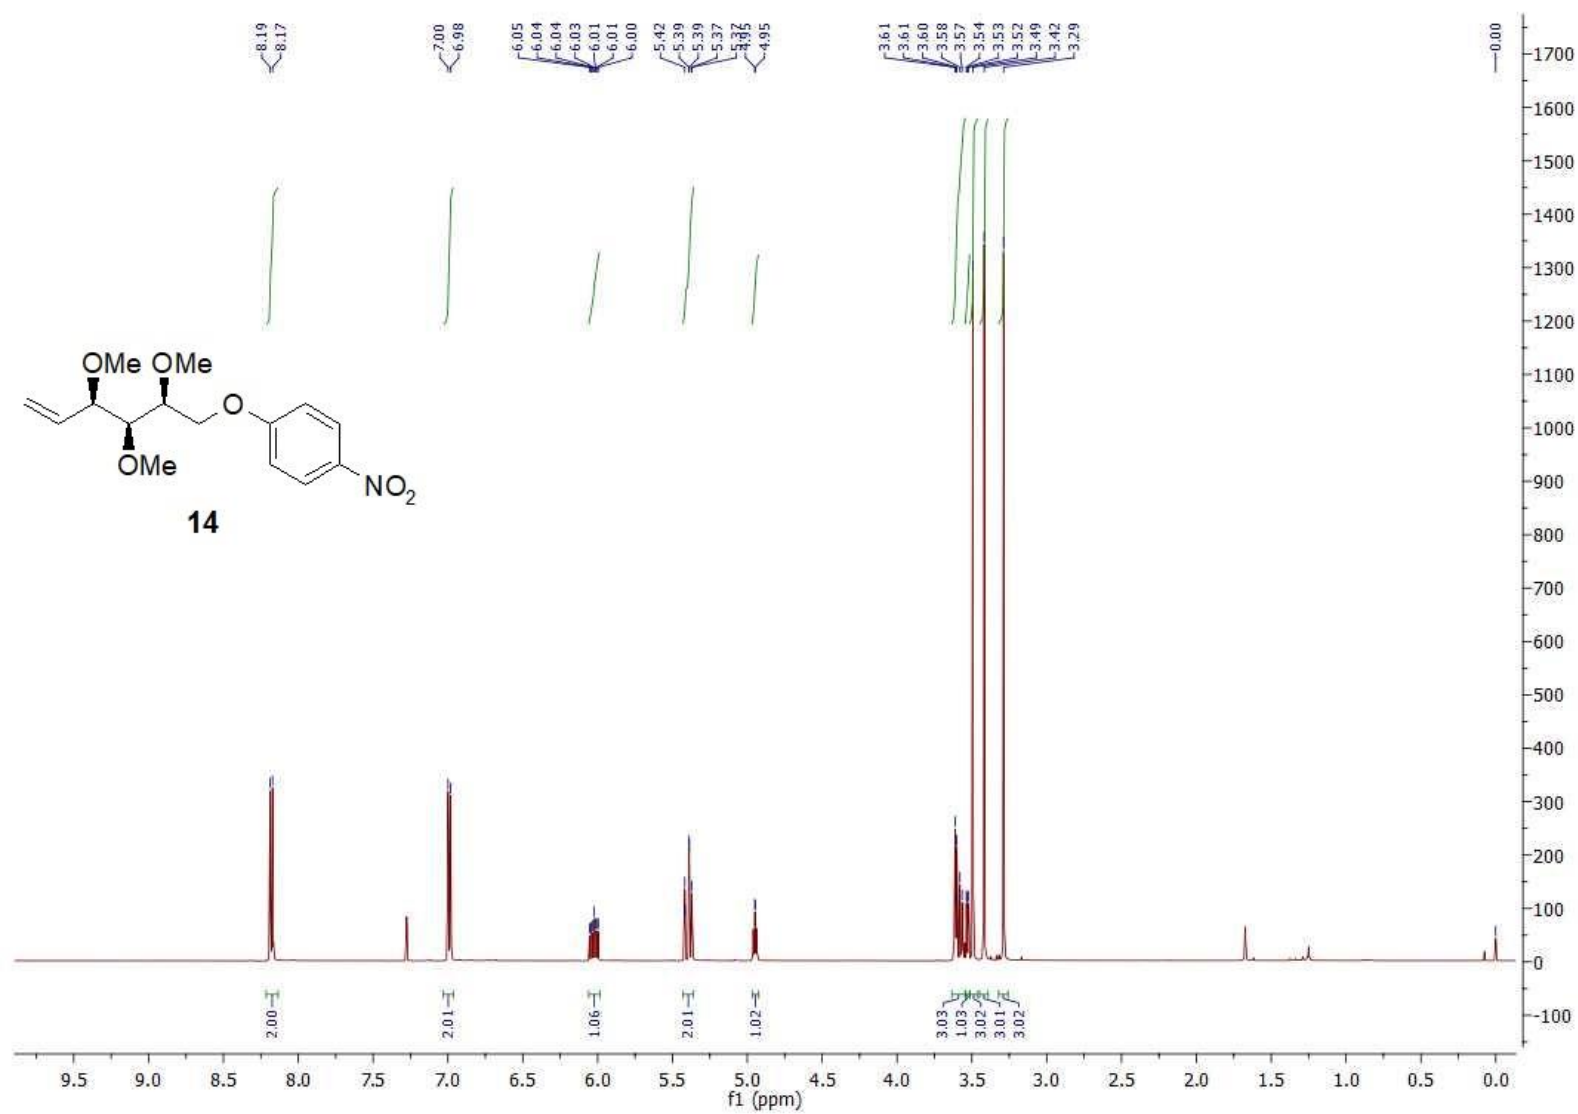

Figure S1  $^1\text{H}$  NMR spectrum of compound **14**.

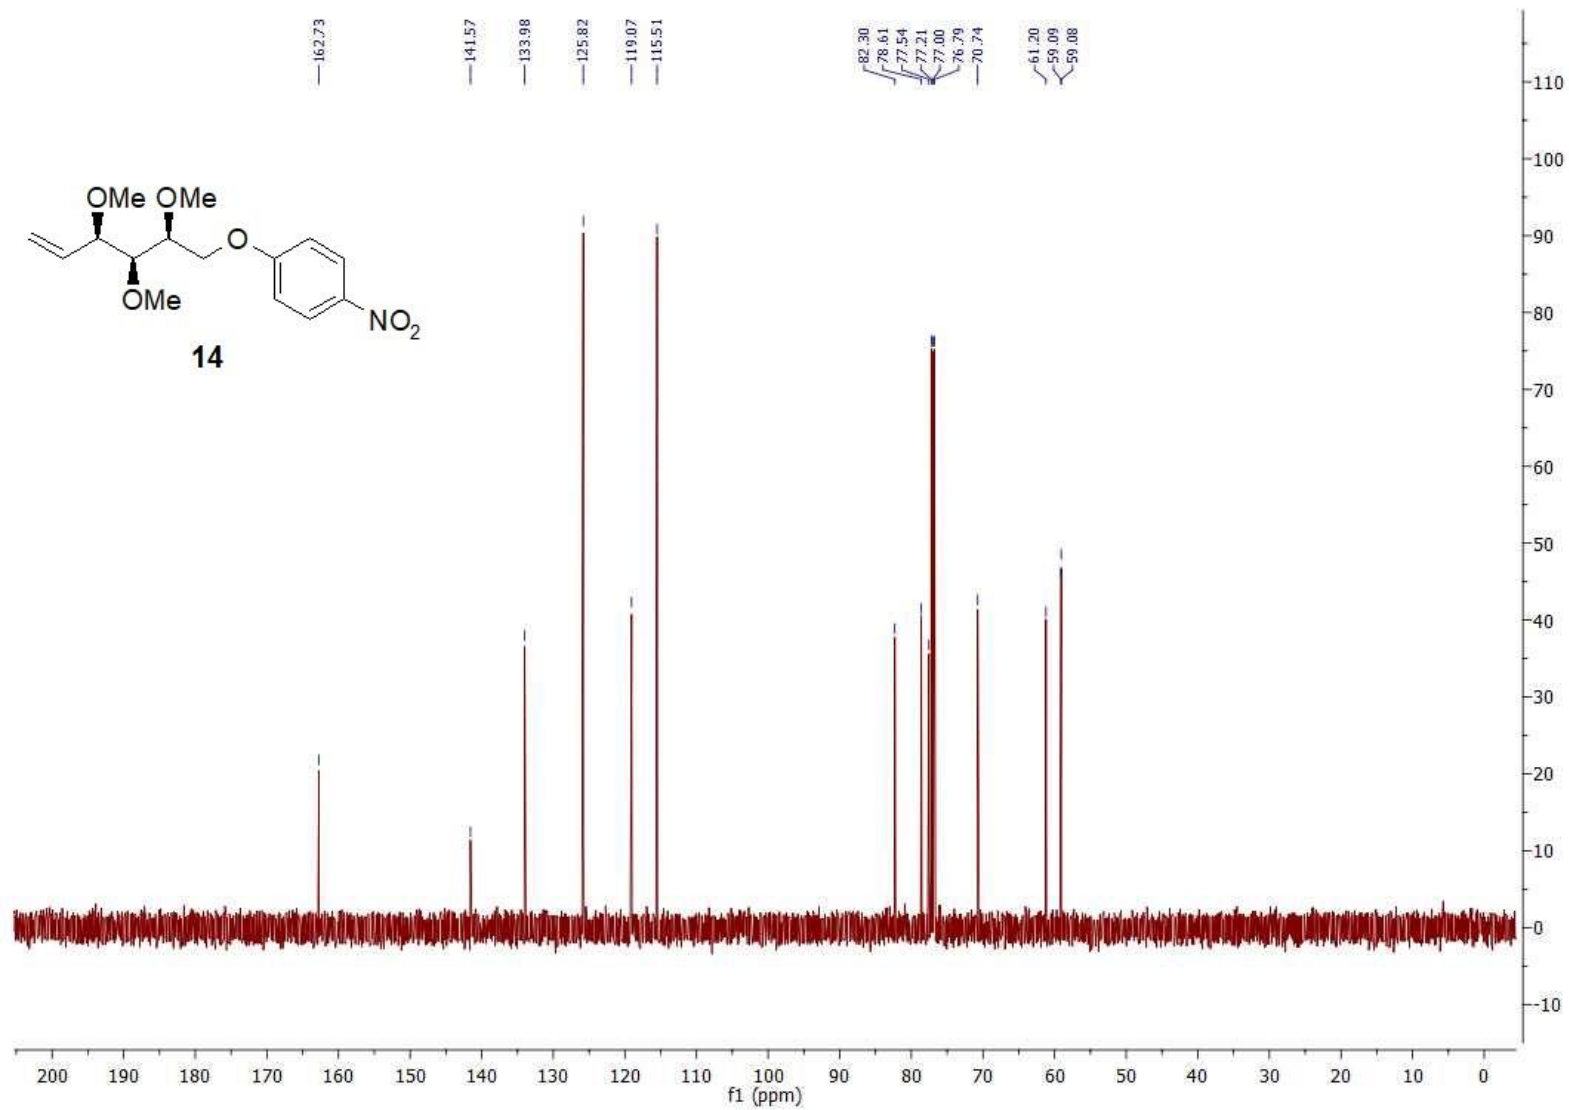

**Figure S2** <sup>13</sup>C NMR spectrum of compound **14**.

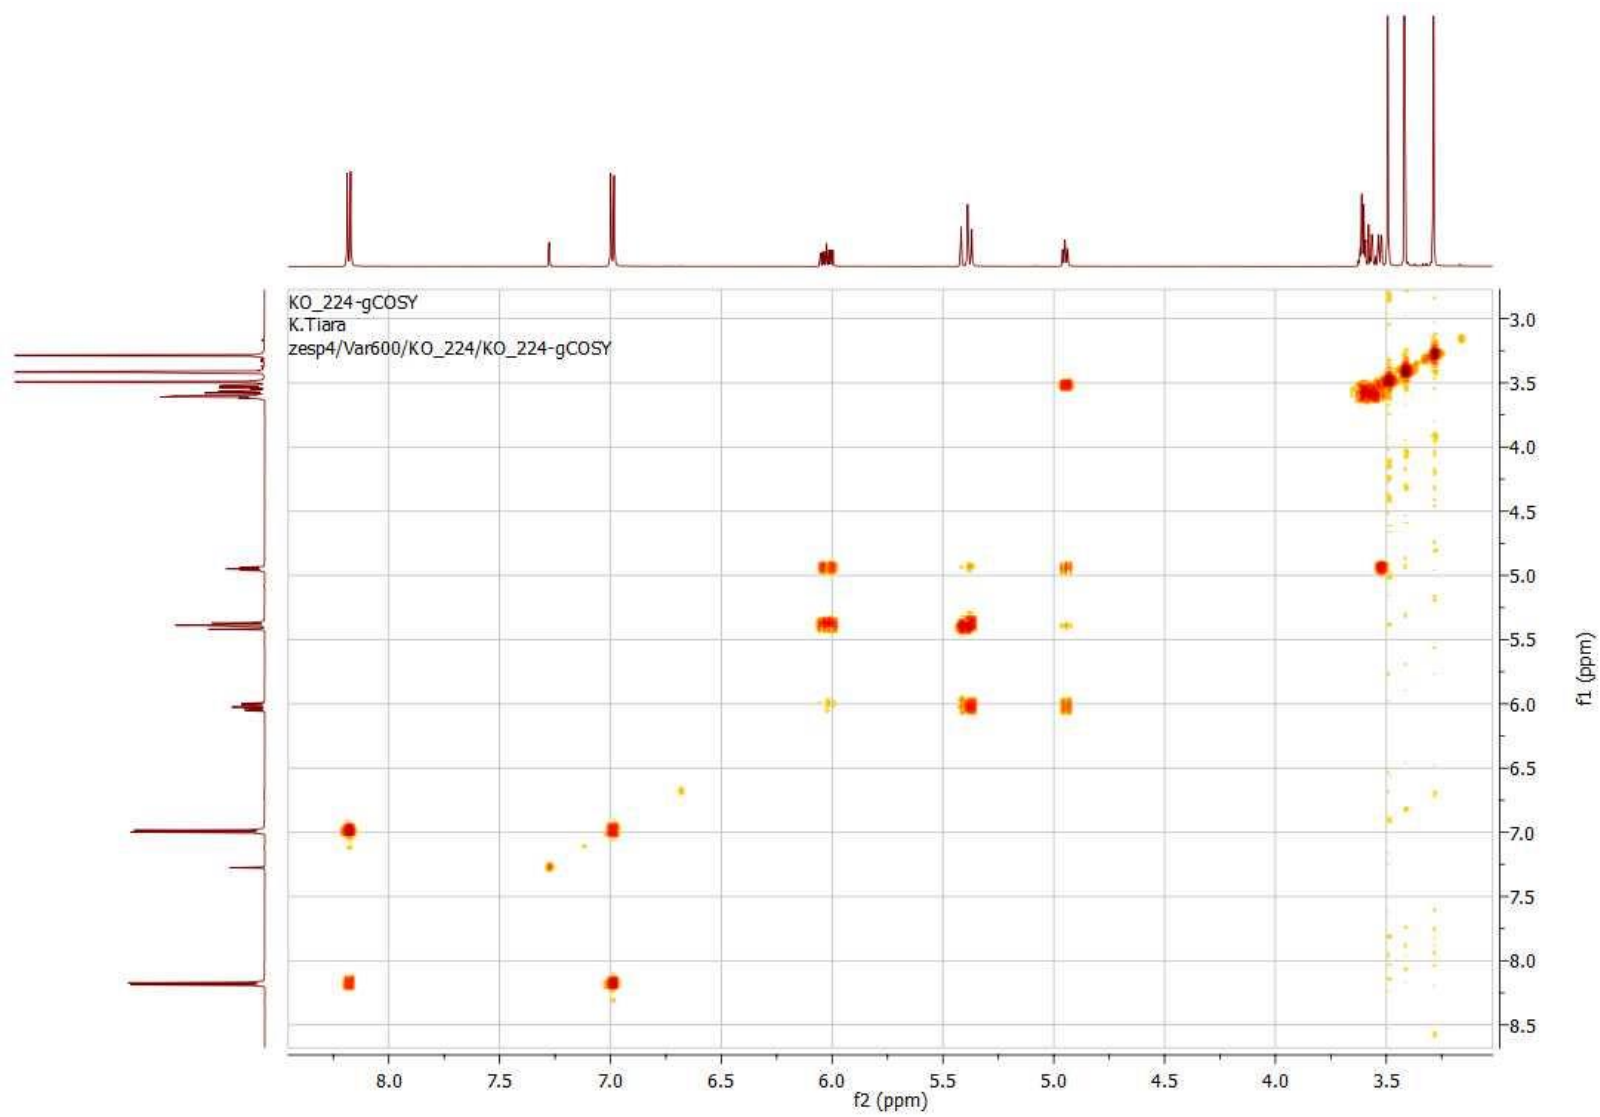

**Figure S3** gCOSY spectrum of compound **14**.

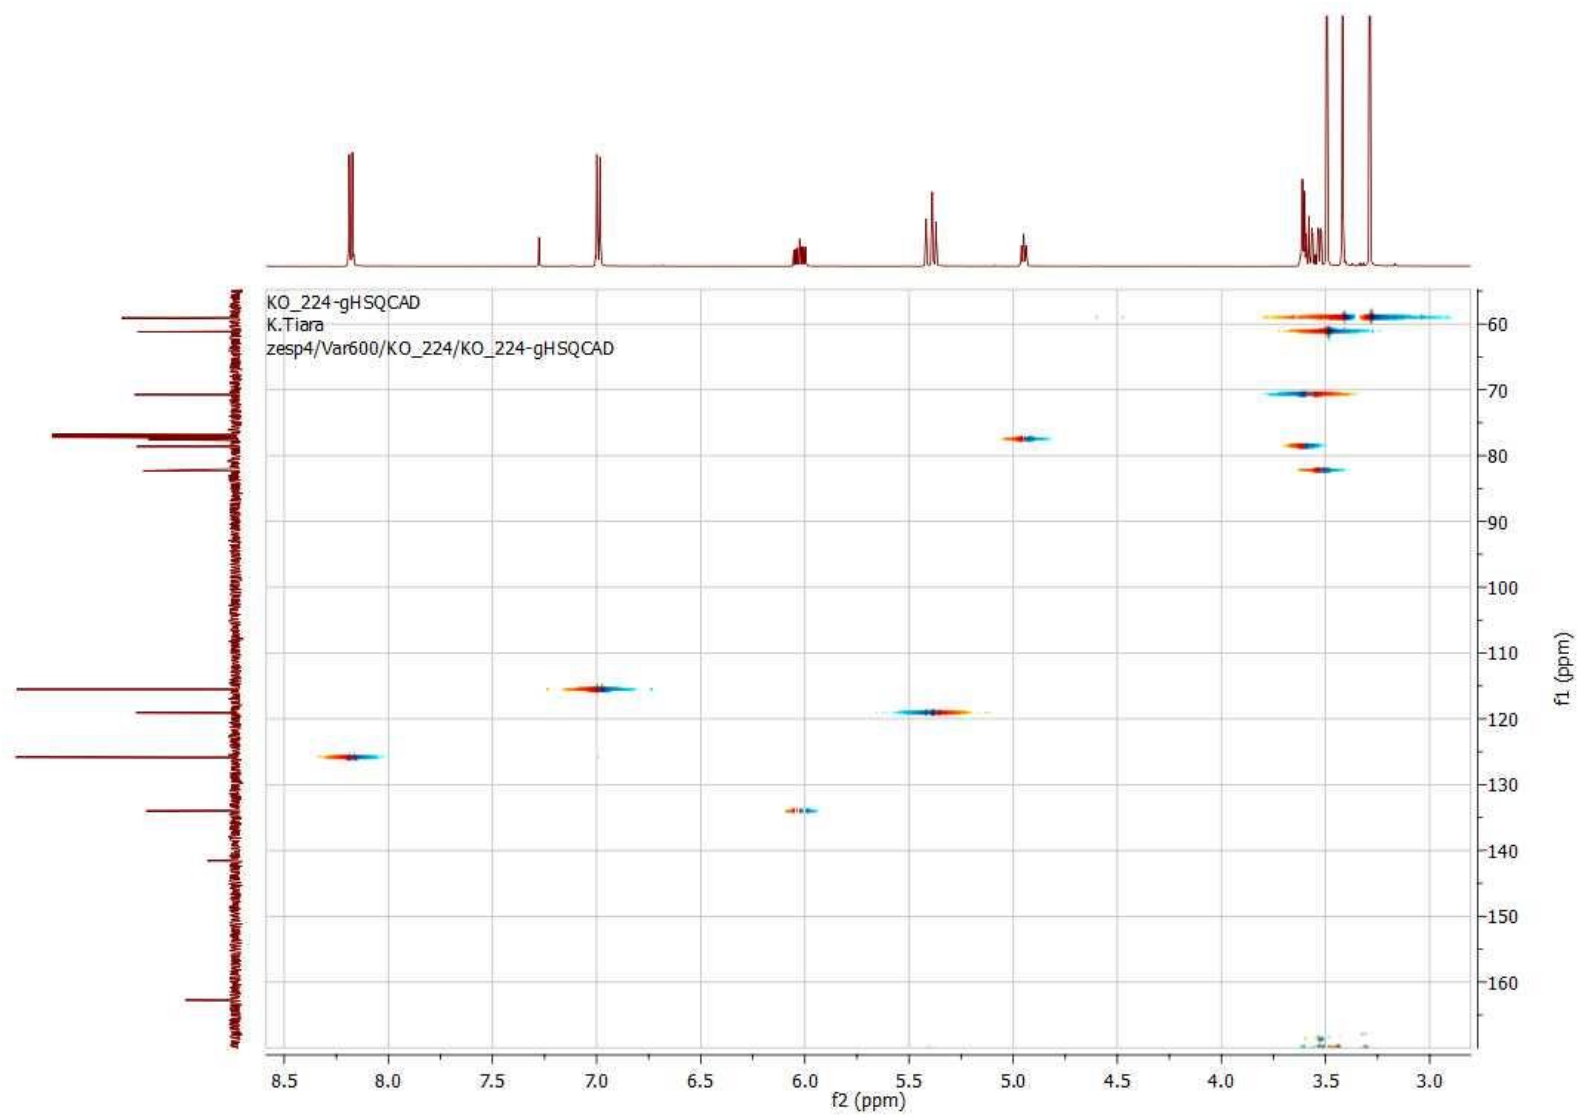

**Figure S4** gHSQCAD spectrum of compound **14**.

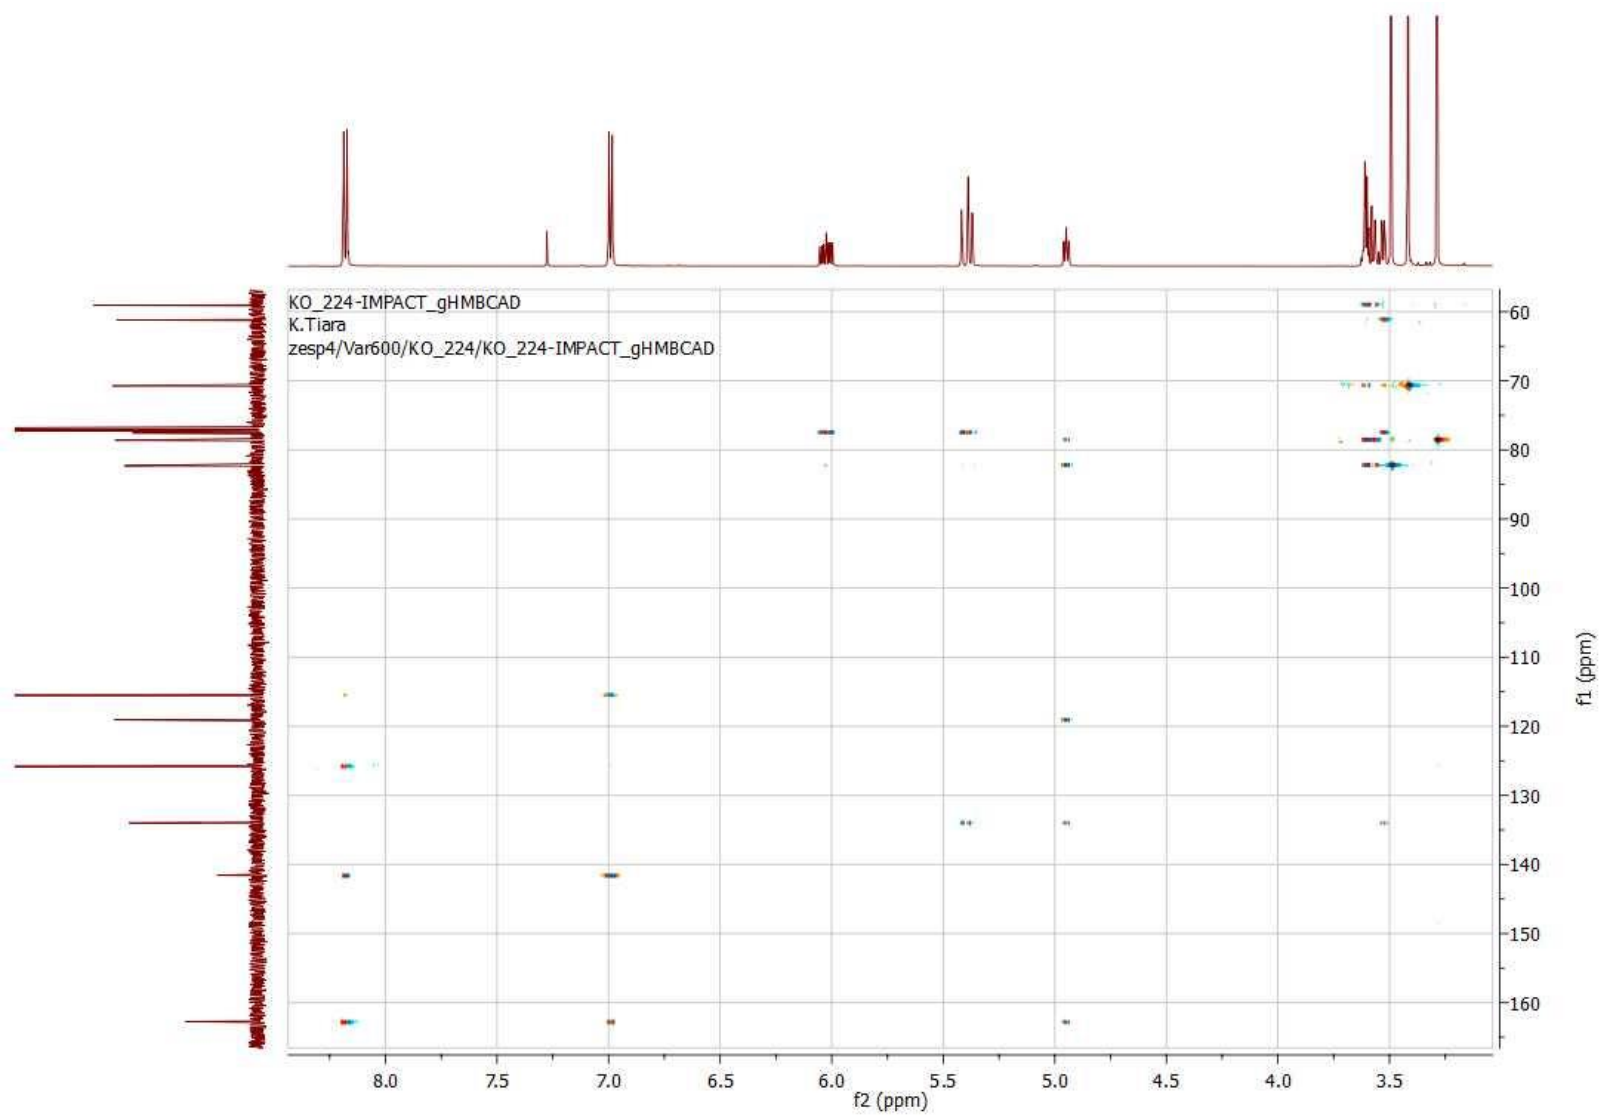

**Figure S5** gHMBCAD spectrum of compound **14**.

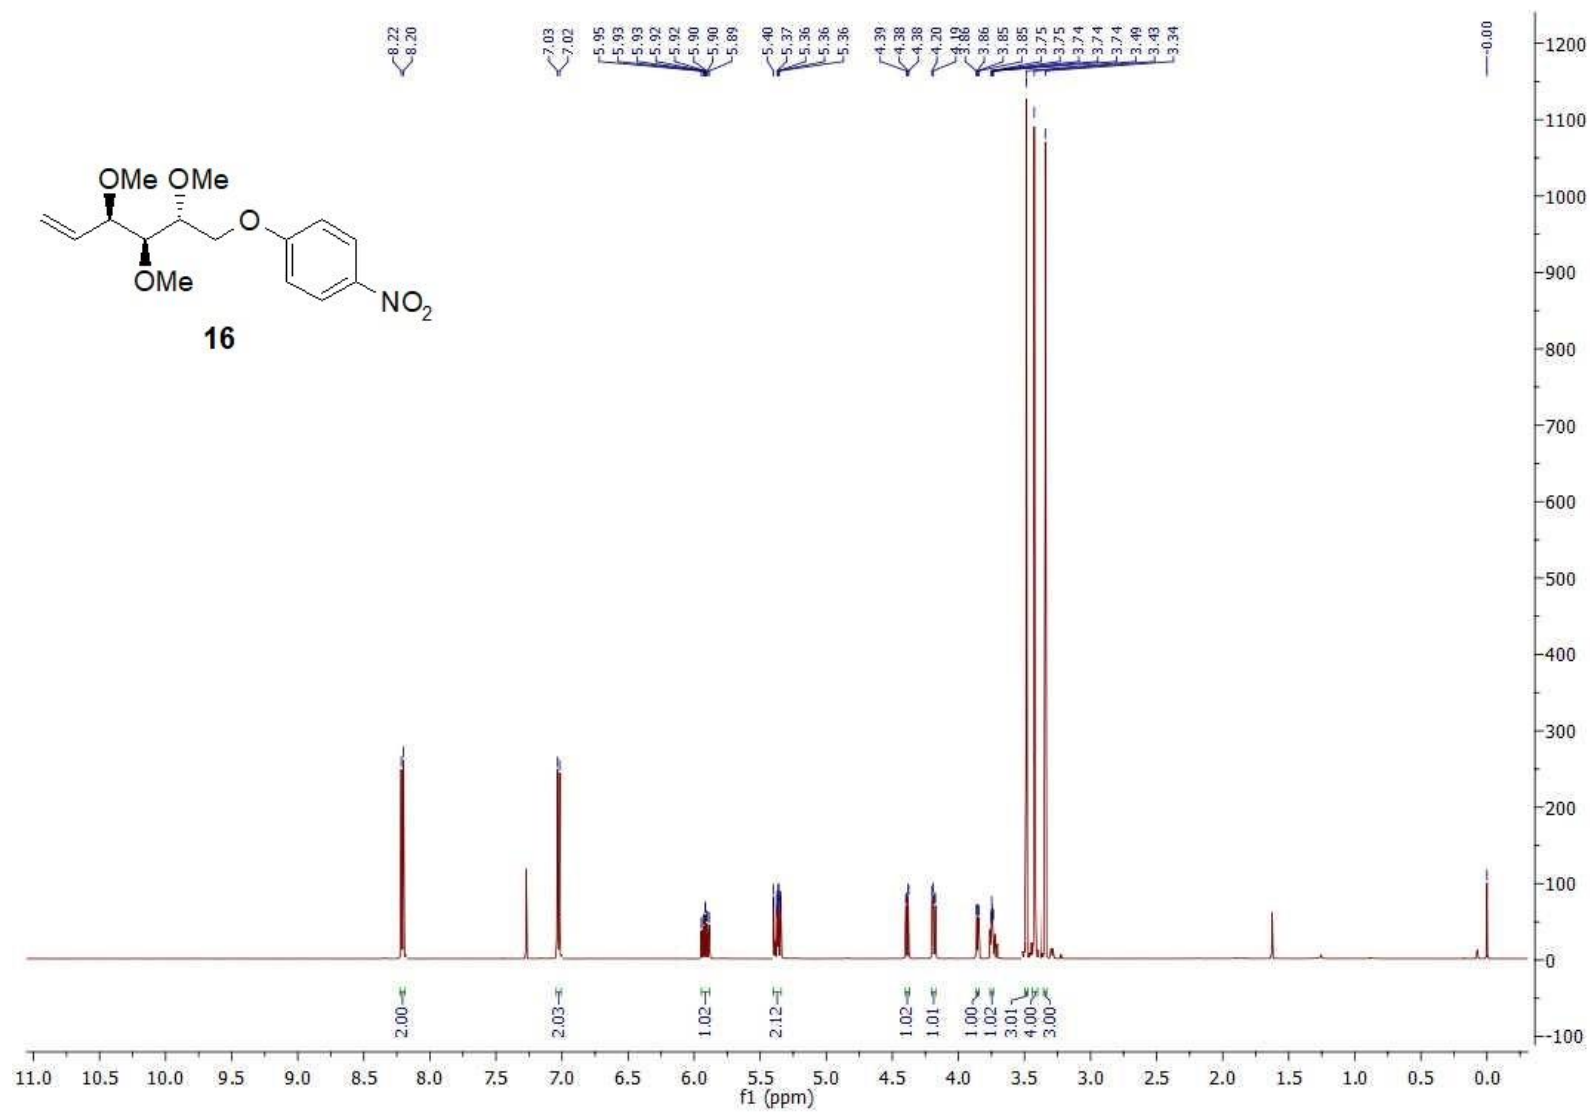

Figure S6 <sup>1</sup>H NMR spectrum of compound **16**.

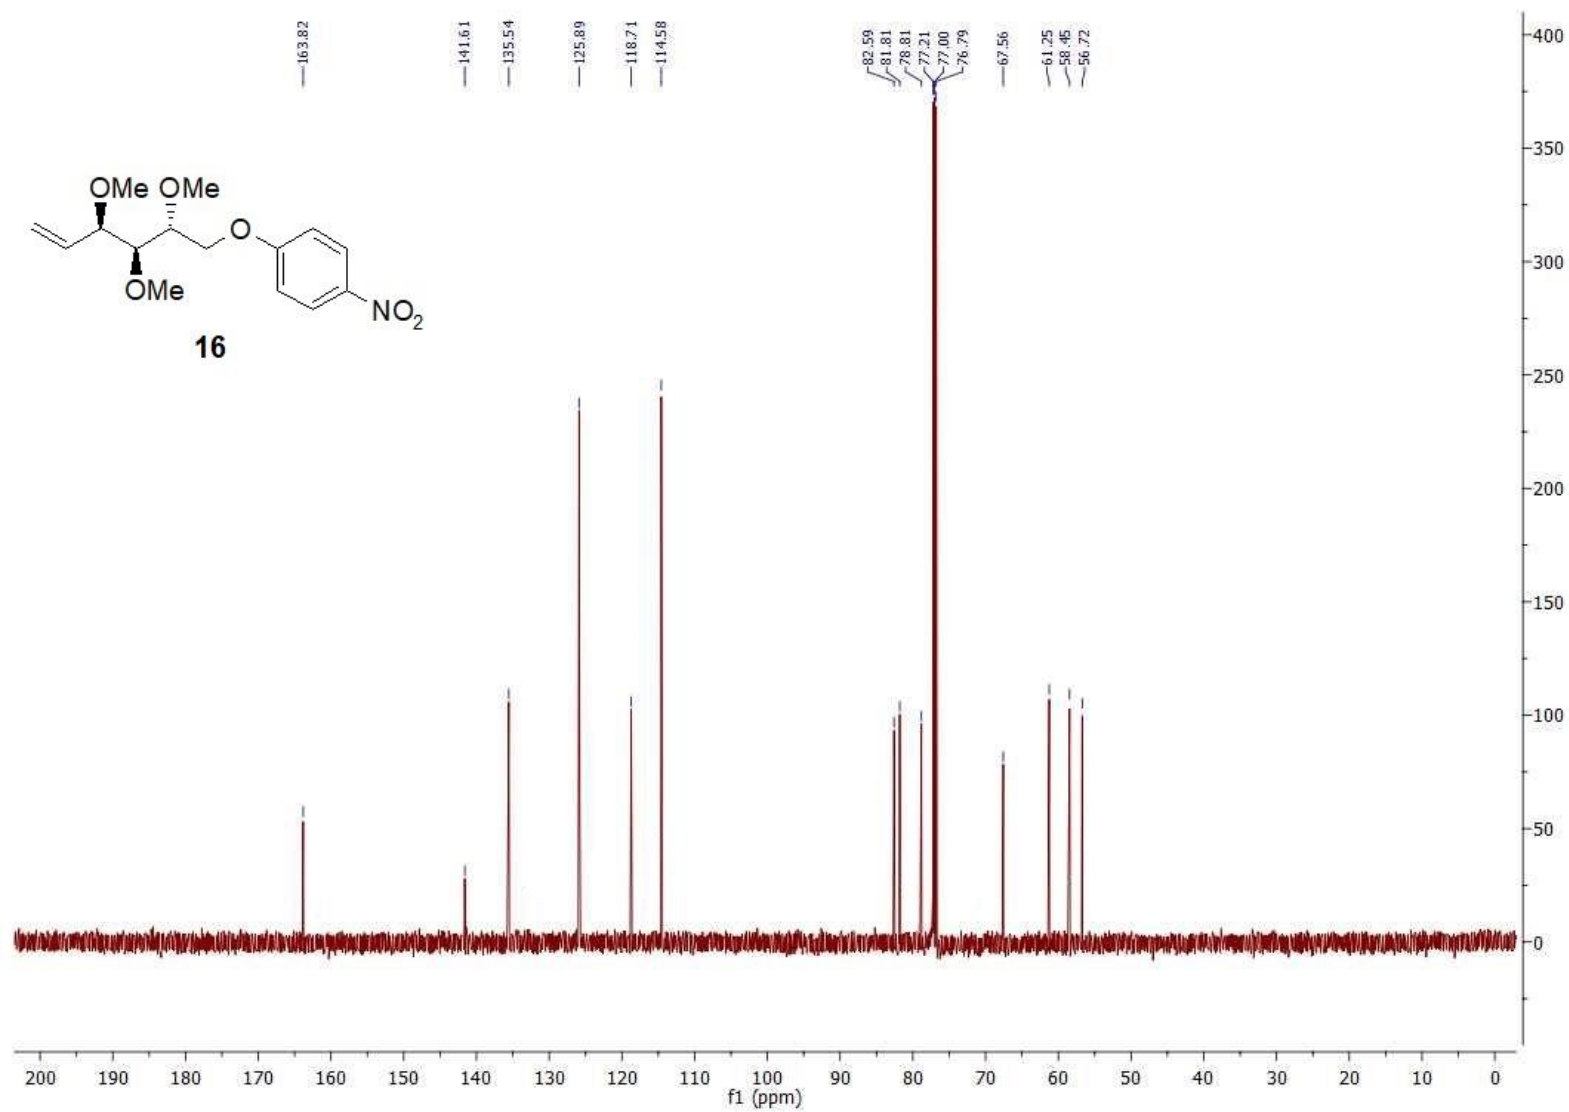

**Figure S7** <sup>13</sup>C NMR spectrum of compound **16**.



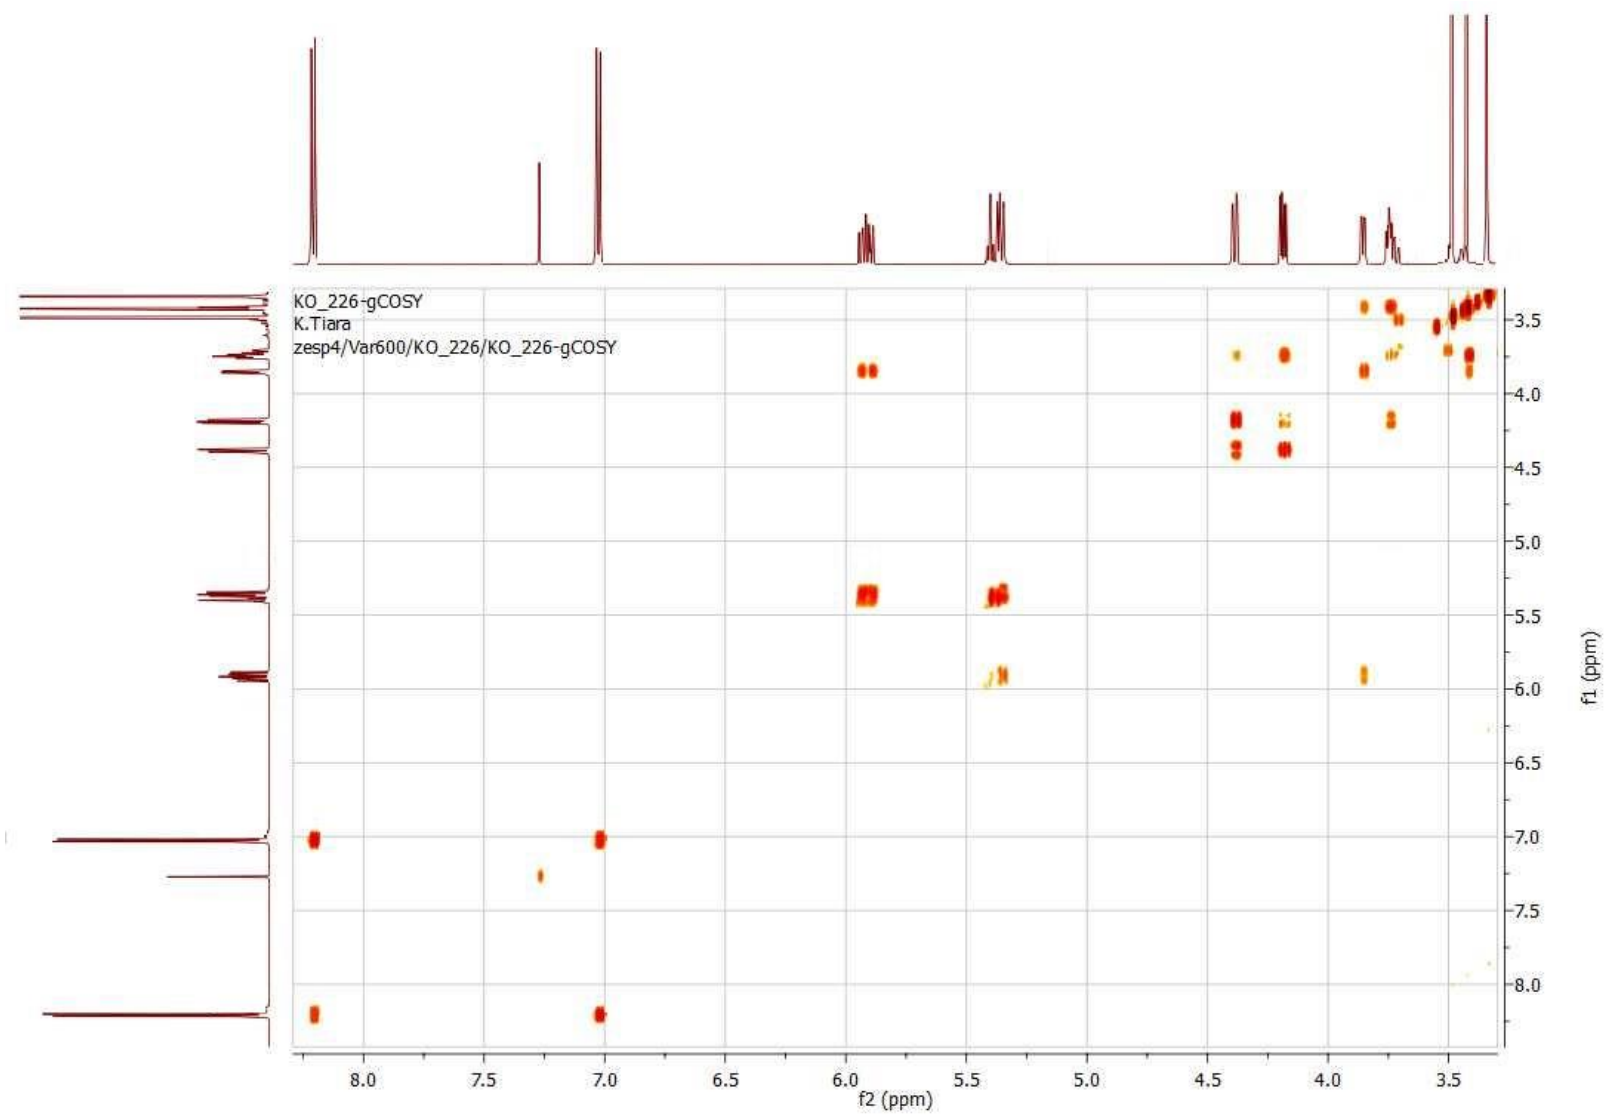

**Figure S8** gCOSY spectrum of compound **16**.

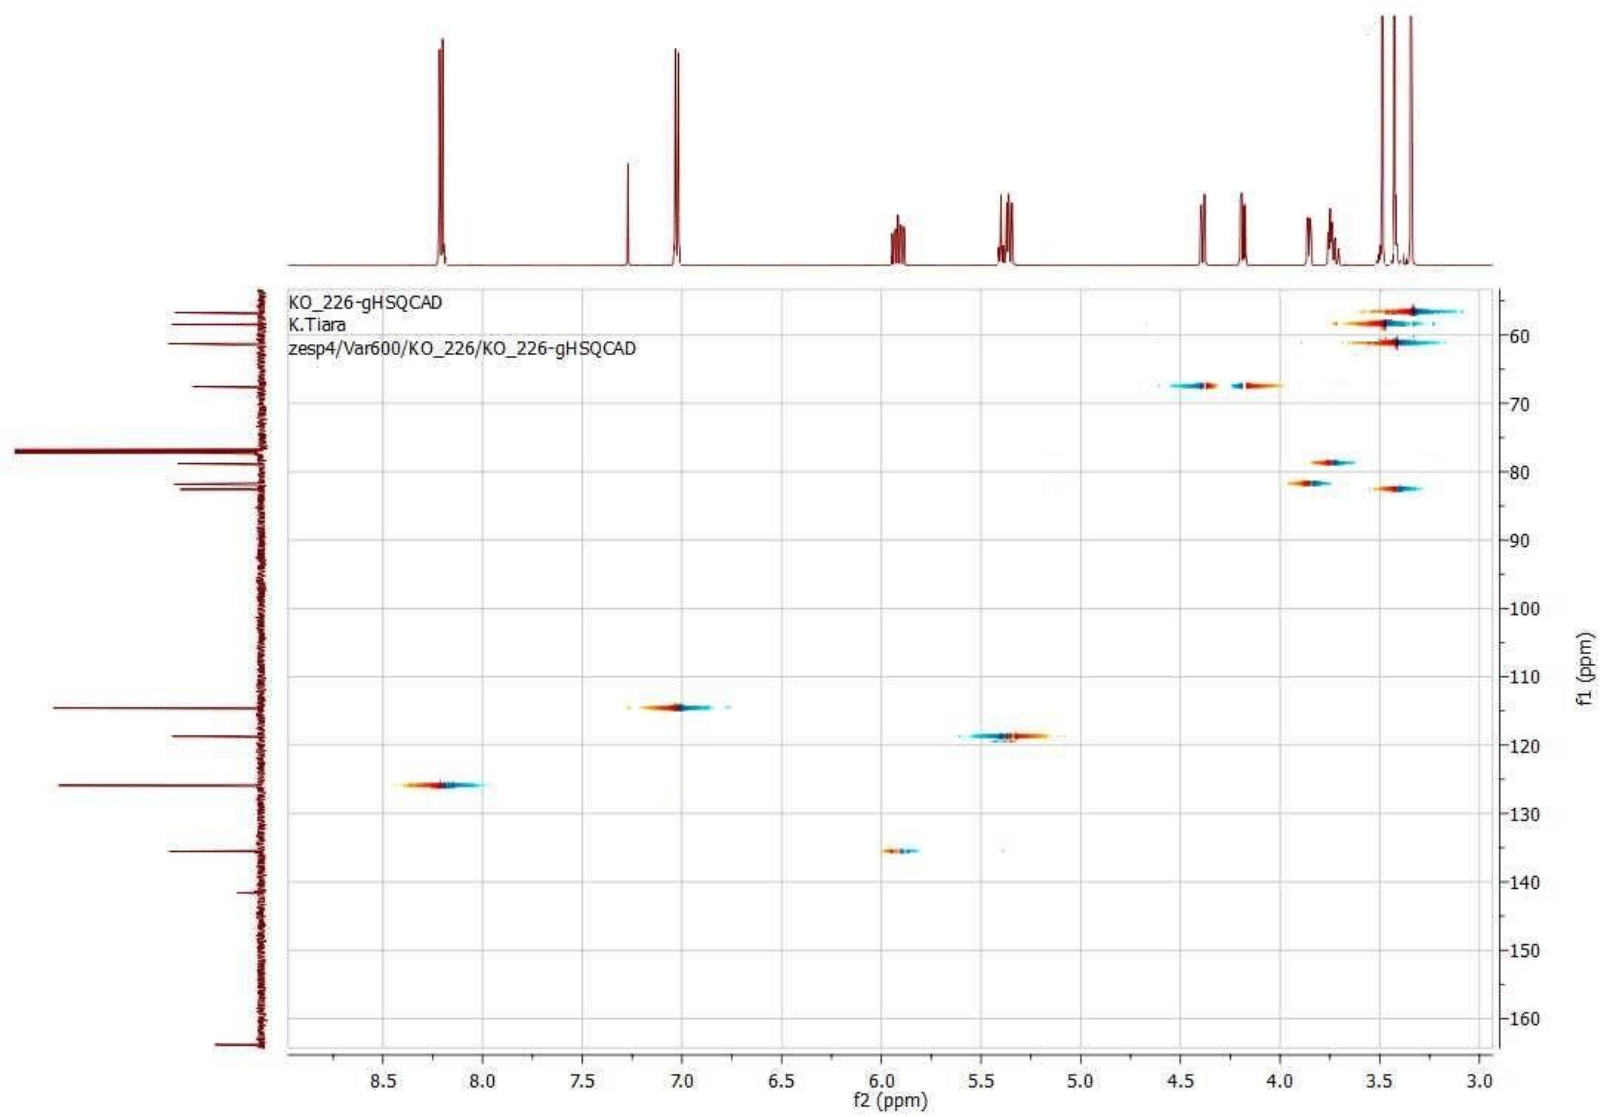

**Figure S9** gHSQCAD spectrum of compound **16**.

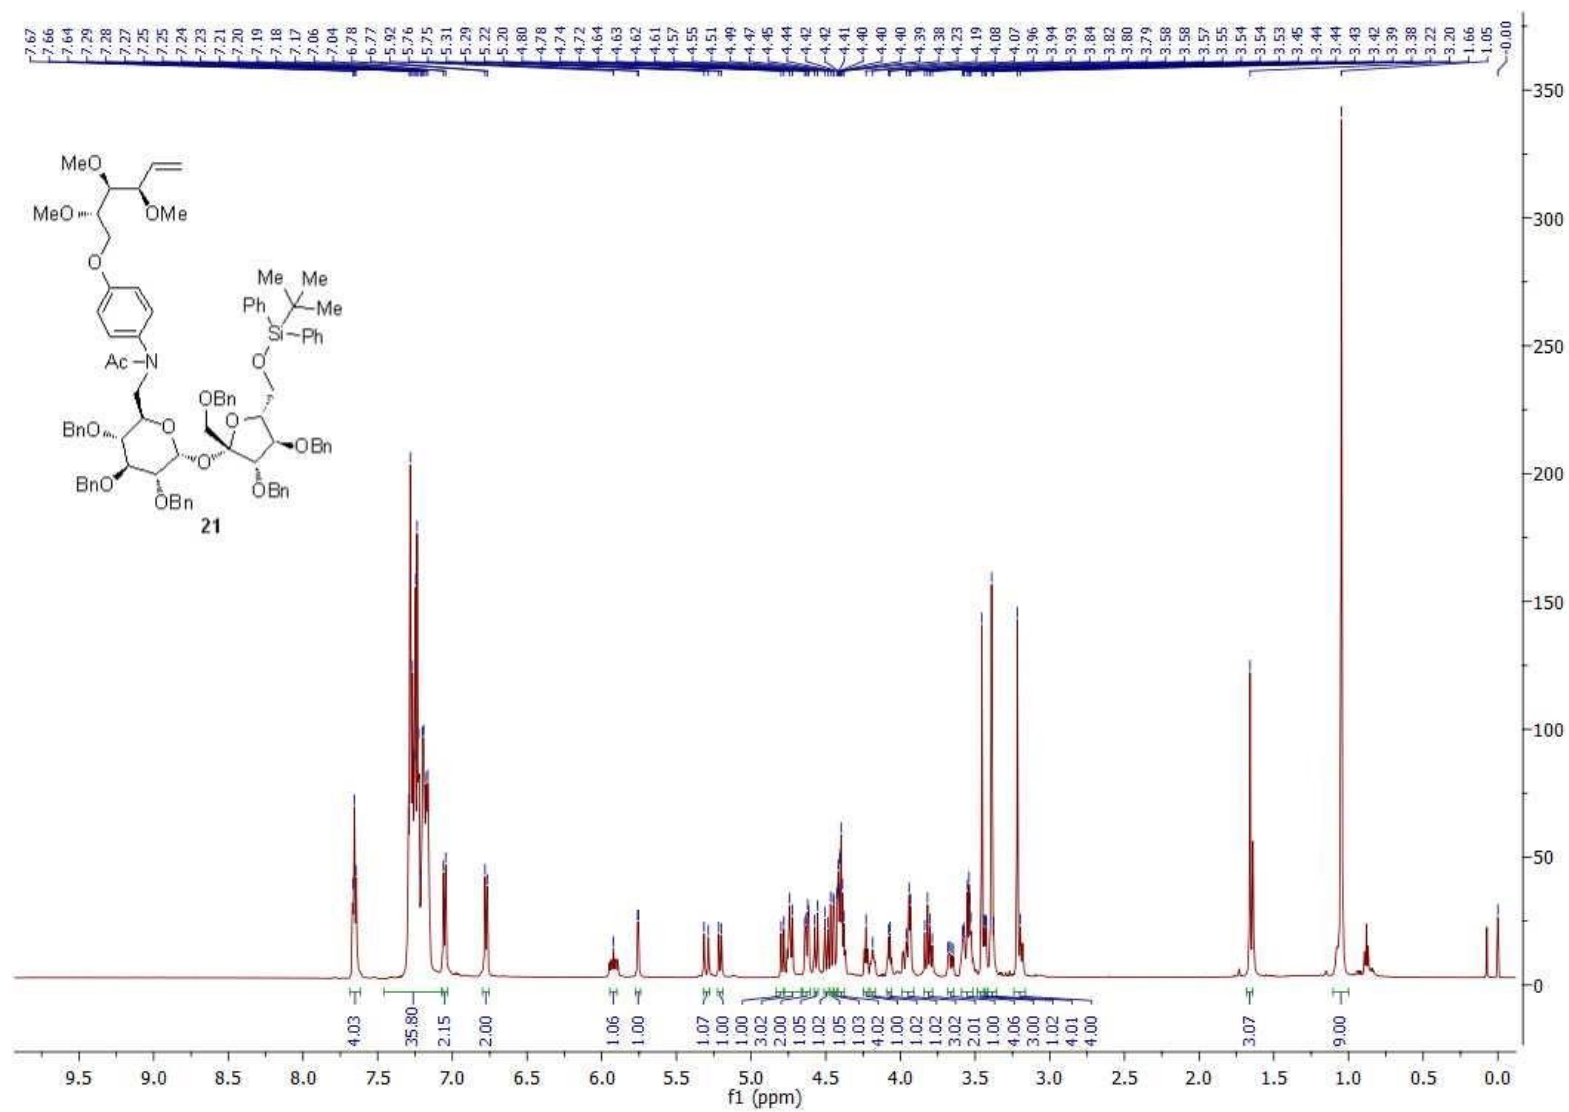

Figure S10  $^1\text{H}$  NMR spectrum of compound **21**.

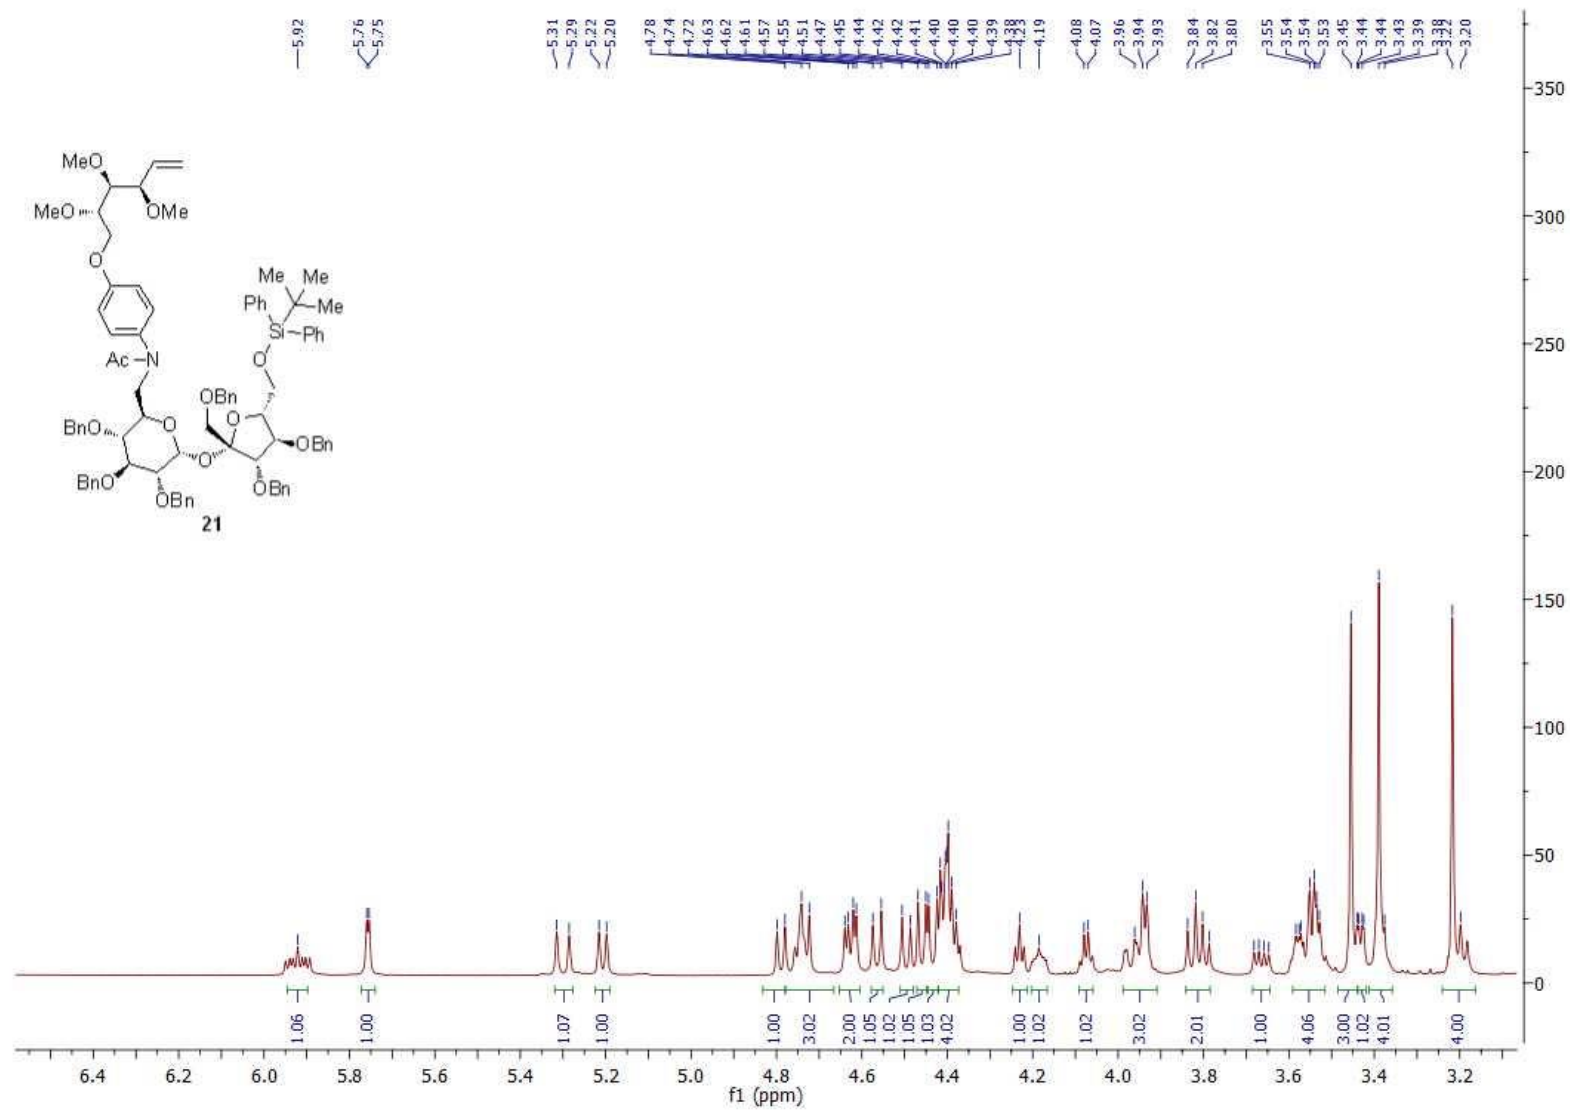

**Figure S11**  $^1\text{H}$  NMR spectrum (aliphatic part) of compound **21**.

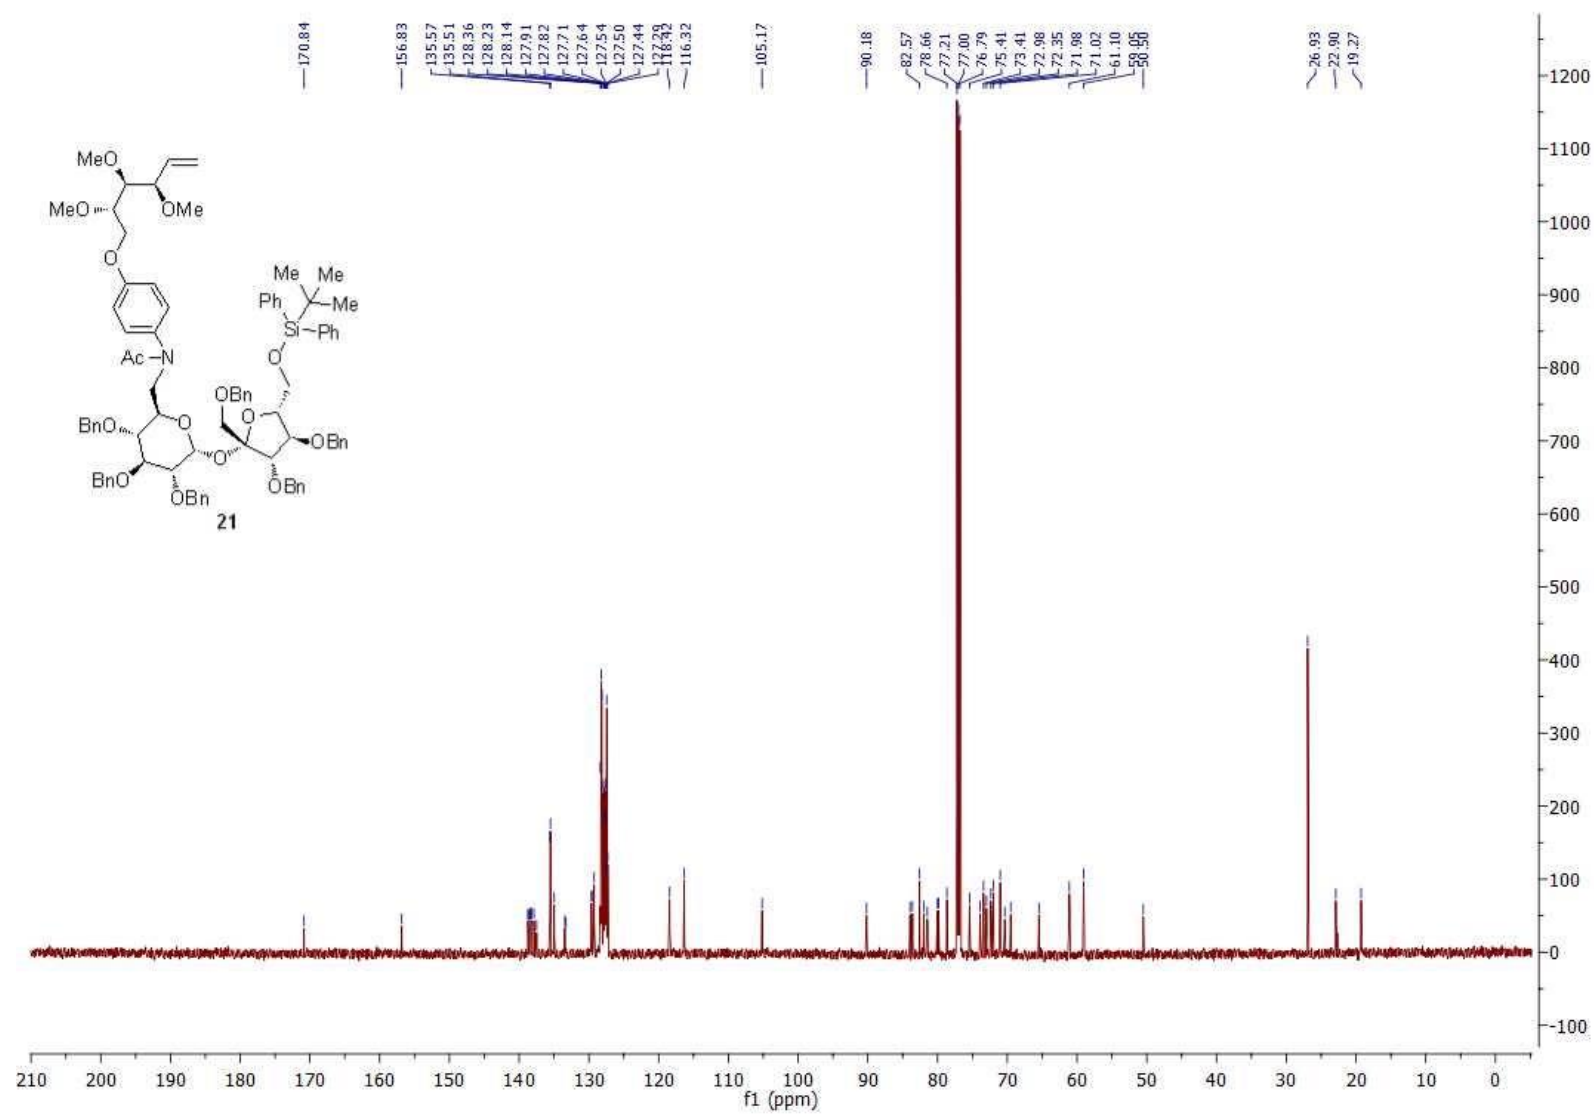

**Figure S12**  $^{13}\text{C}$  NMR spectrum of compound **21**.

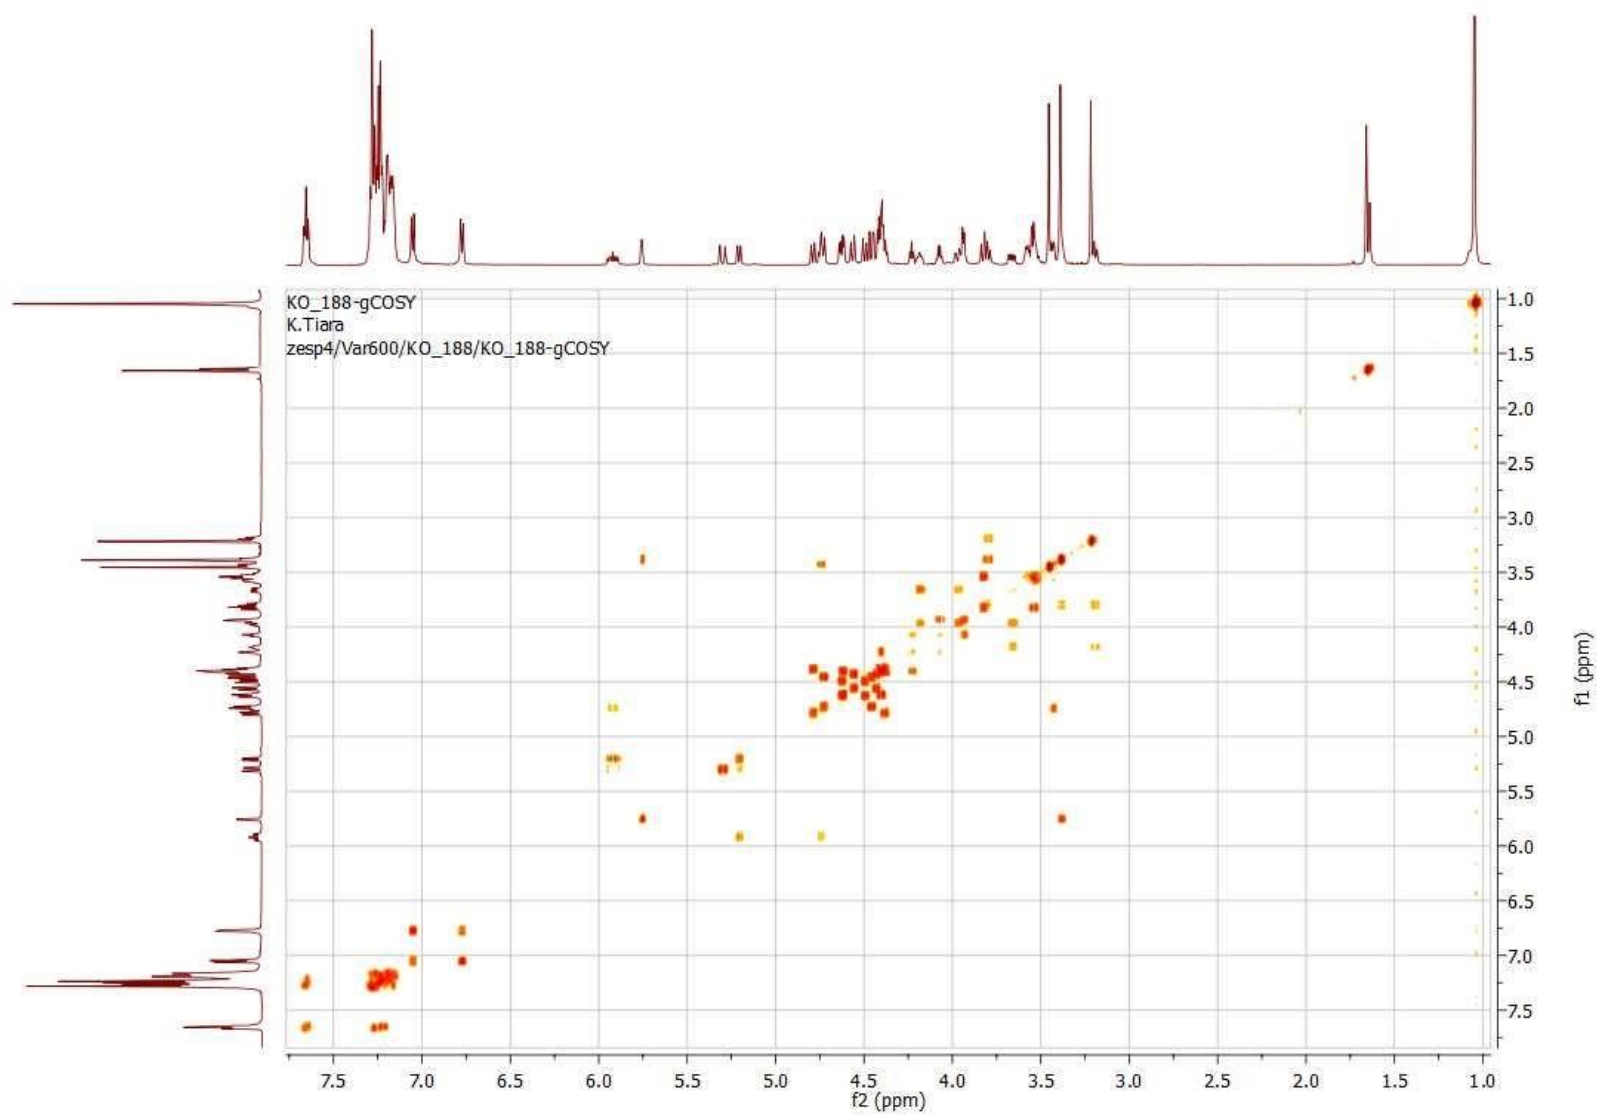

**Figure S13** COSY spectrum of compound **21**.

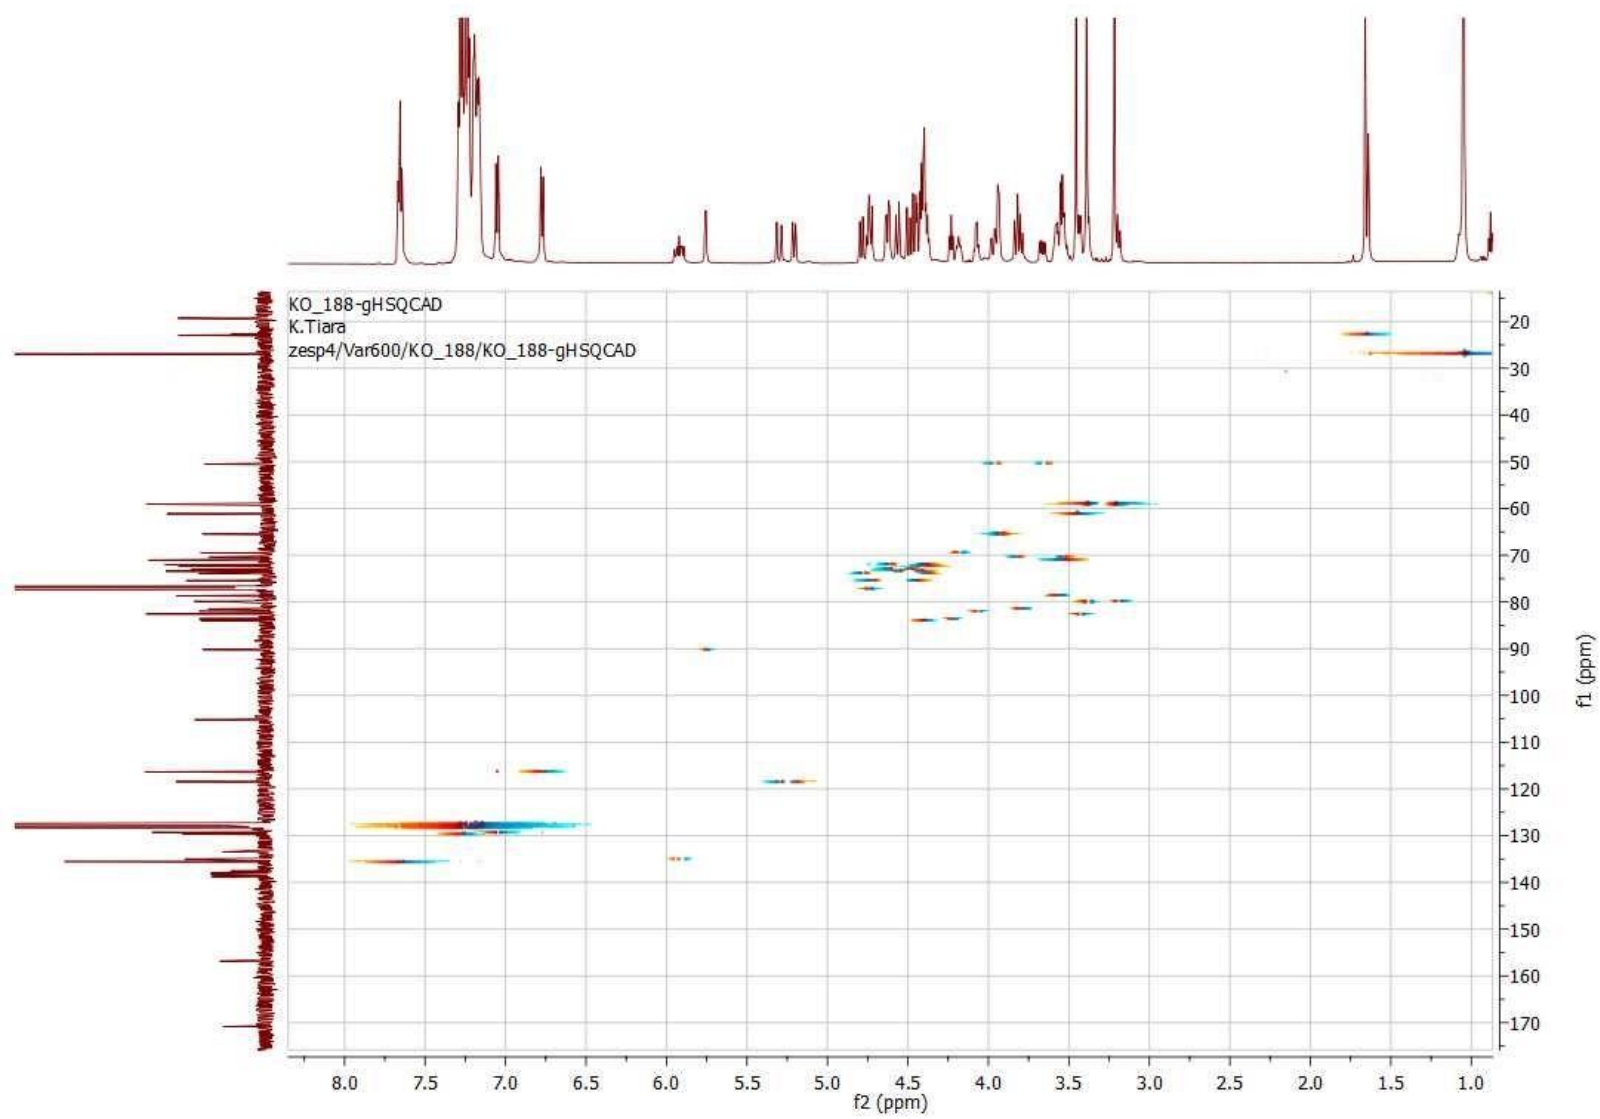

**Figure S14** gHSQCAD spectrum of compound **21**.

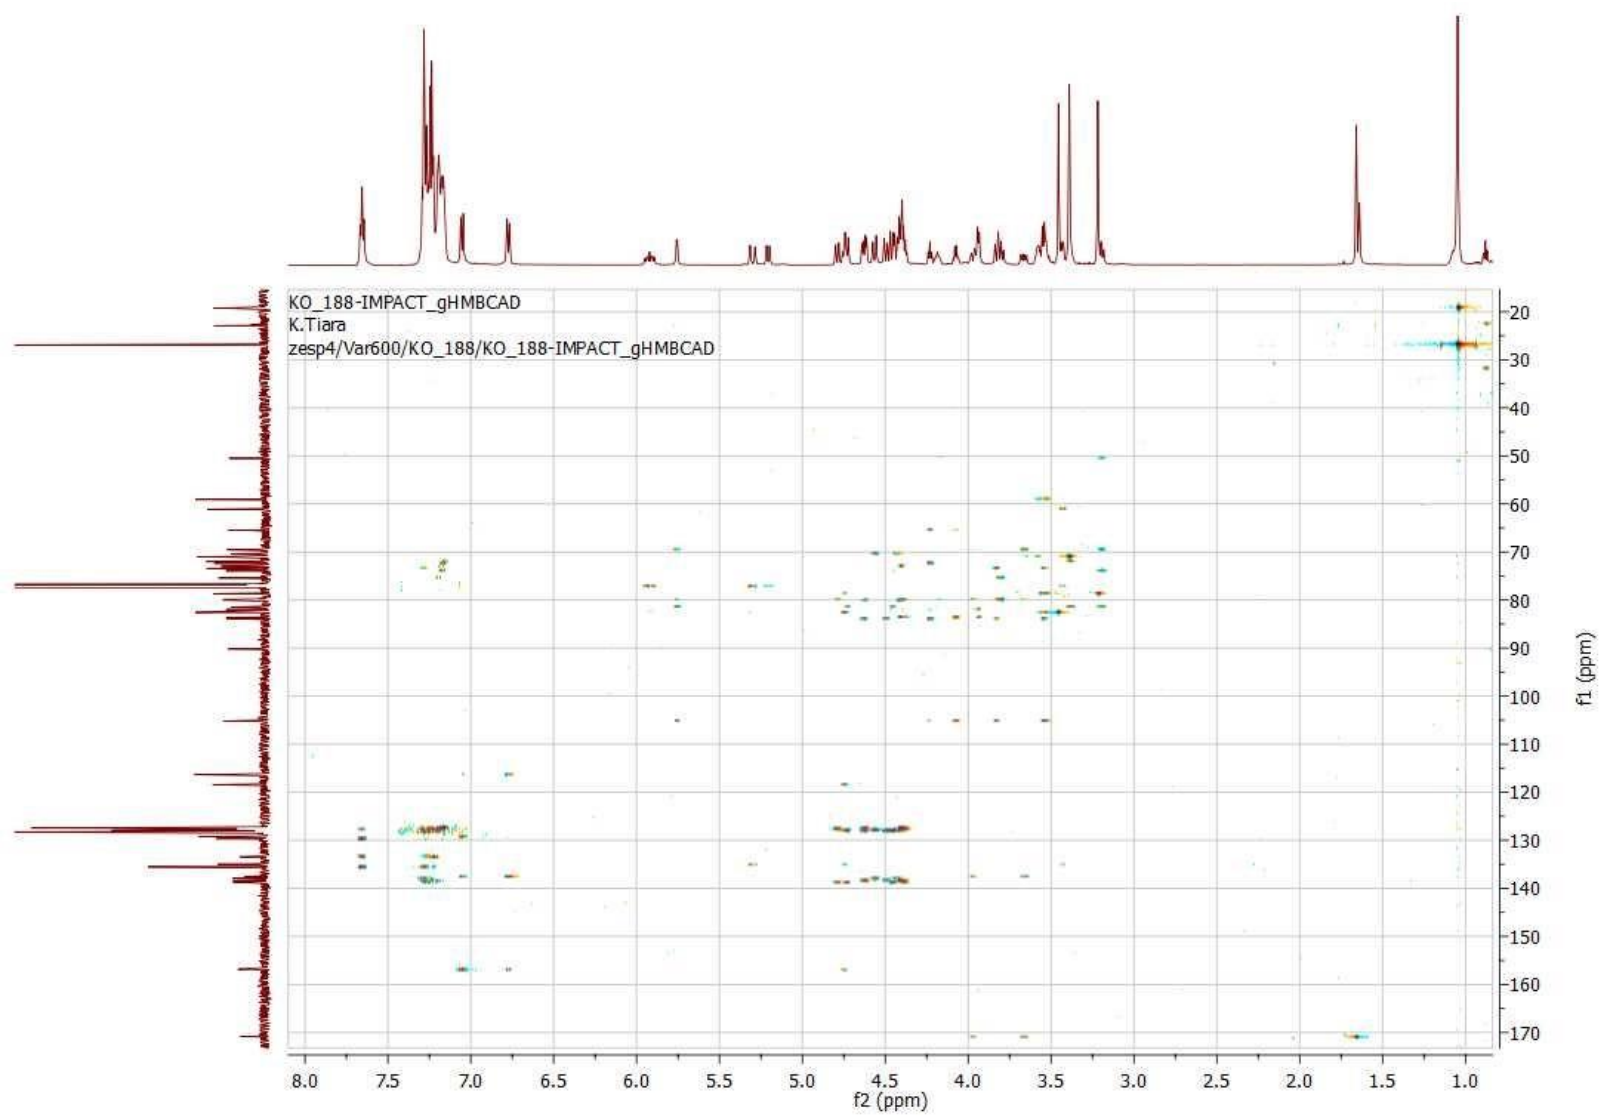

**Figure S15** gHMBCAD spectrum of compound **21**.



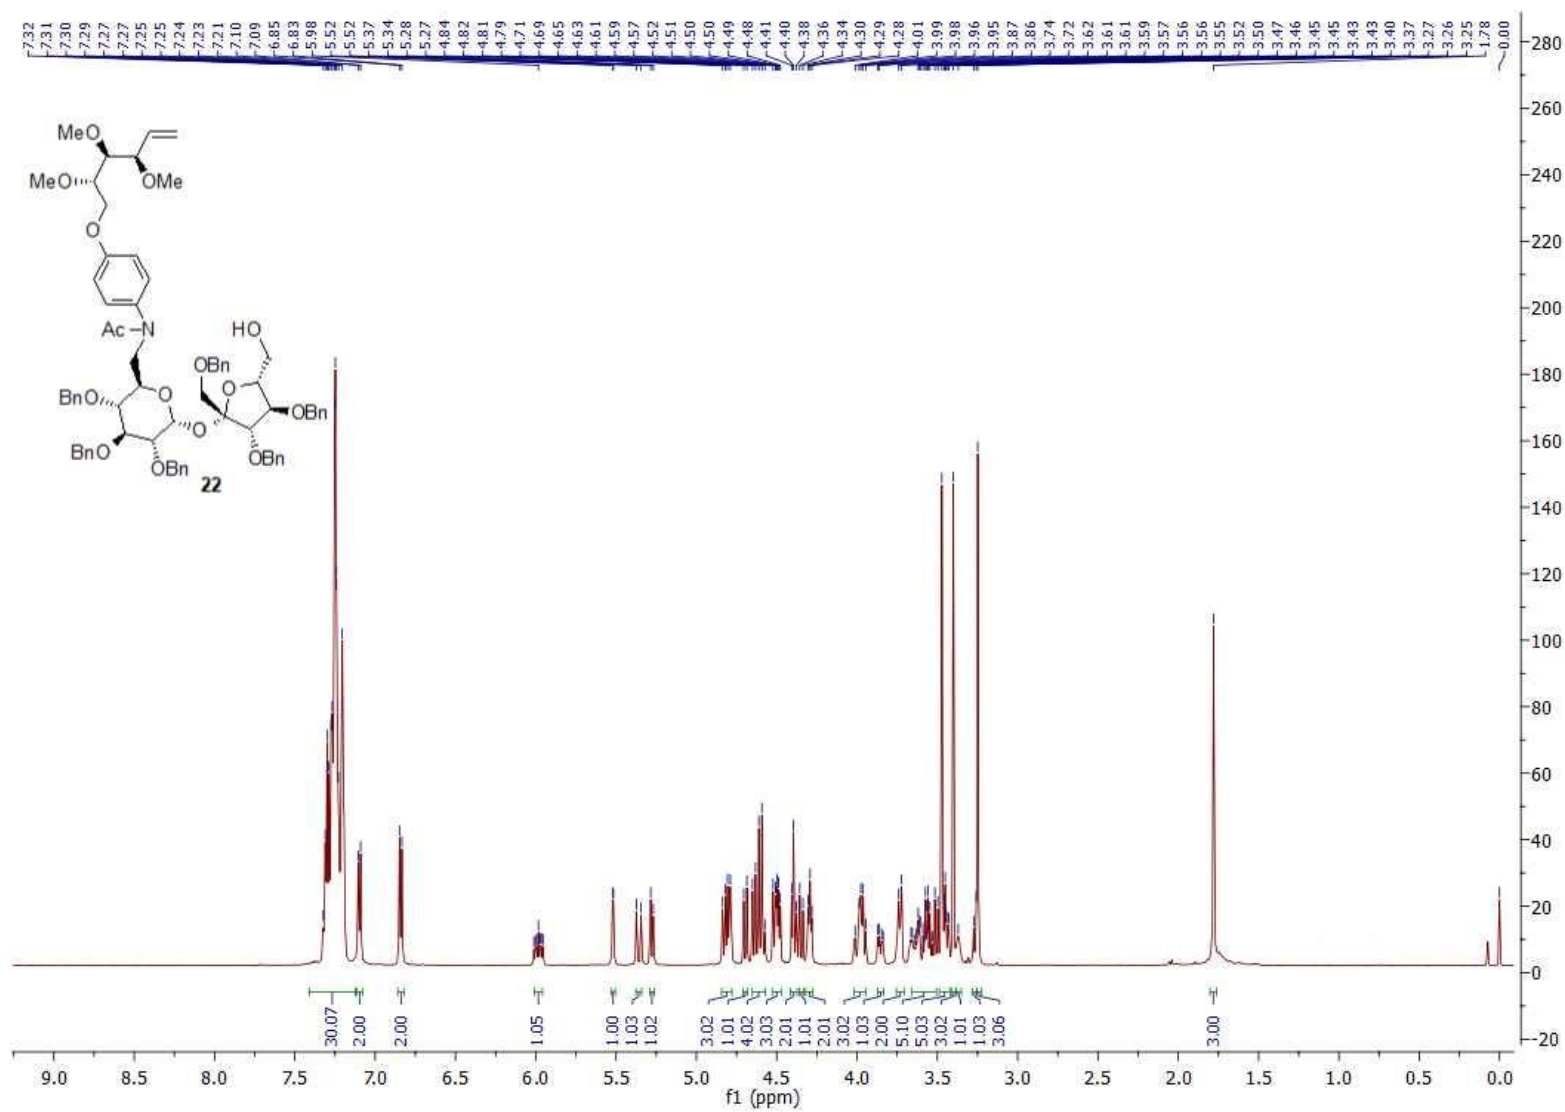

Figure S16 <sup>1</sup>H NMR spectrum of compound 22.

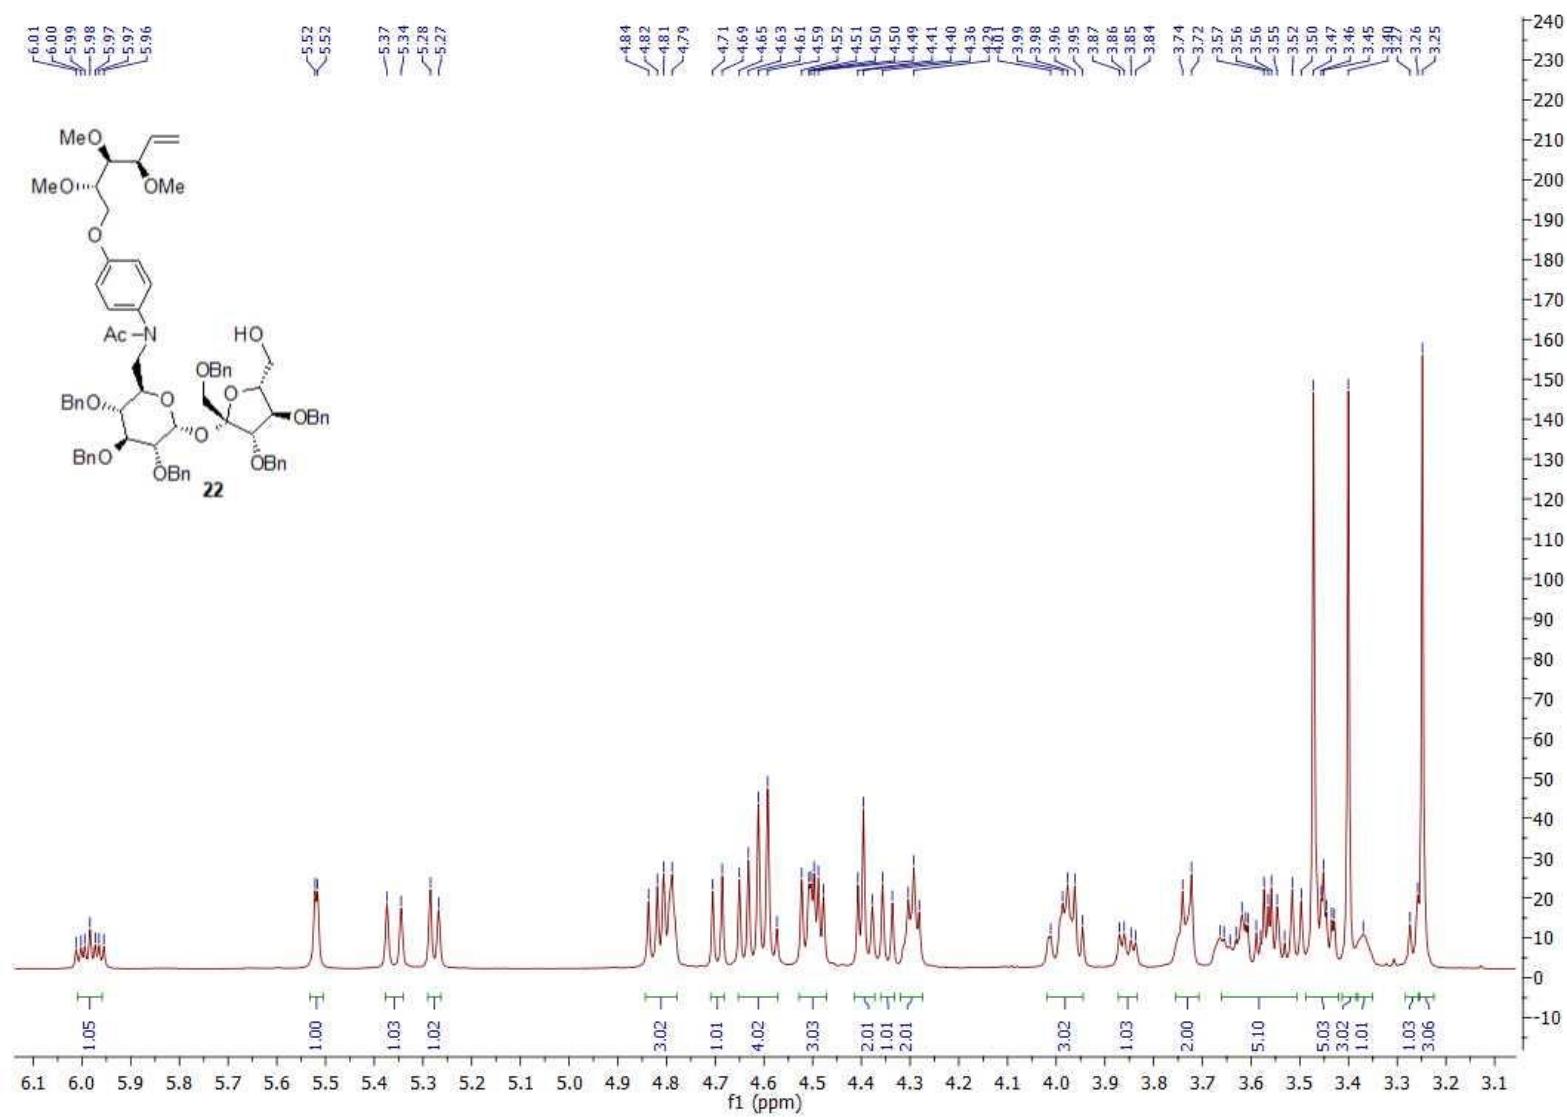

**Figure S17**  $^1\text{H}$  NMR spectrum (aliphatic part) of compound **22**.

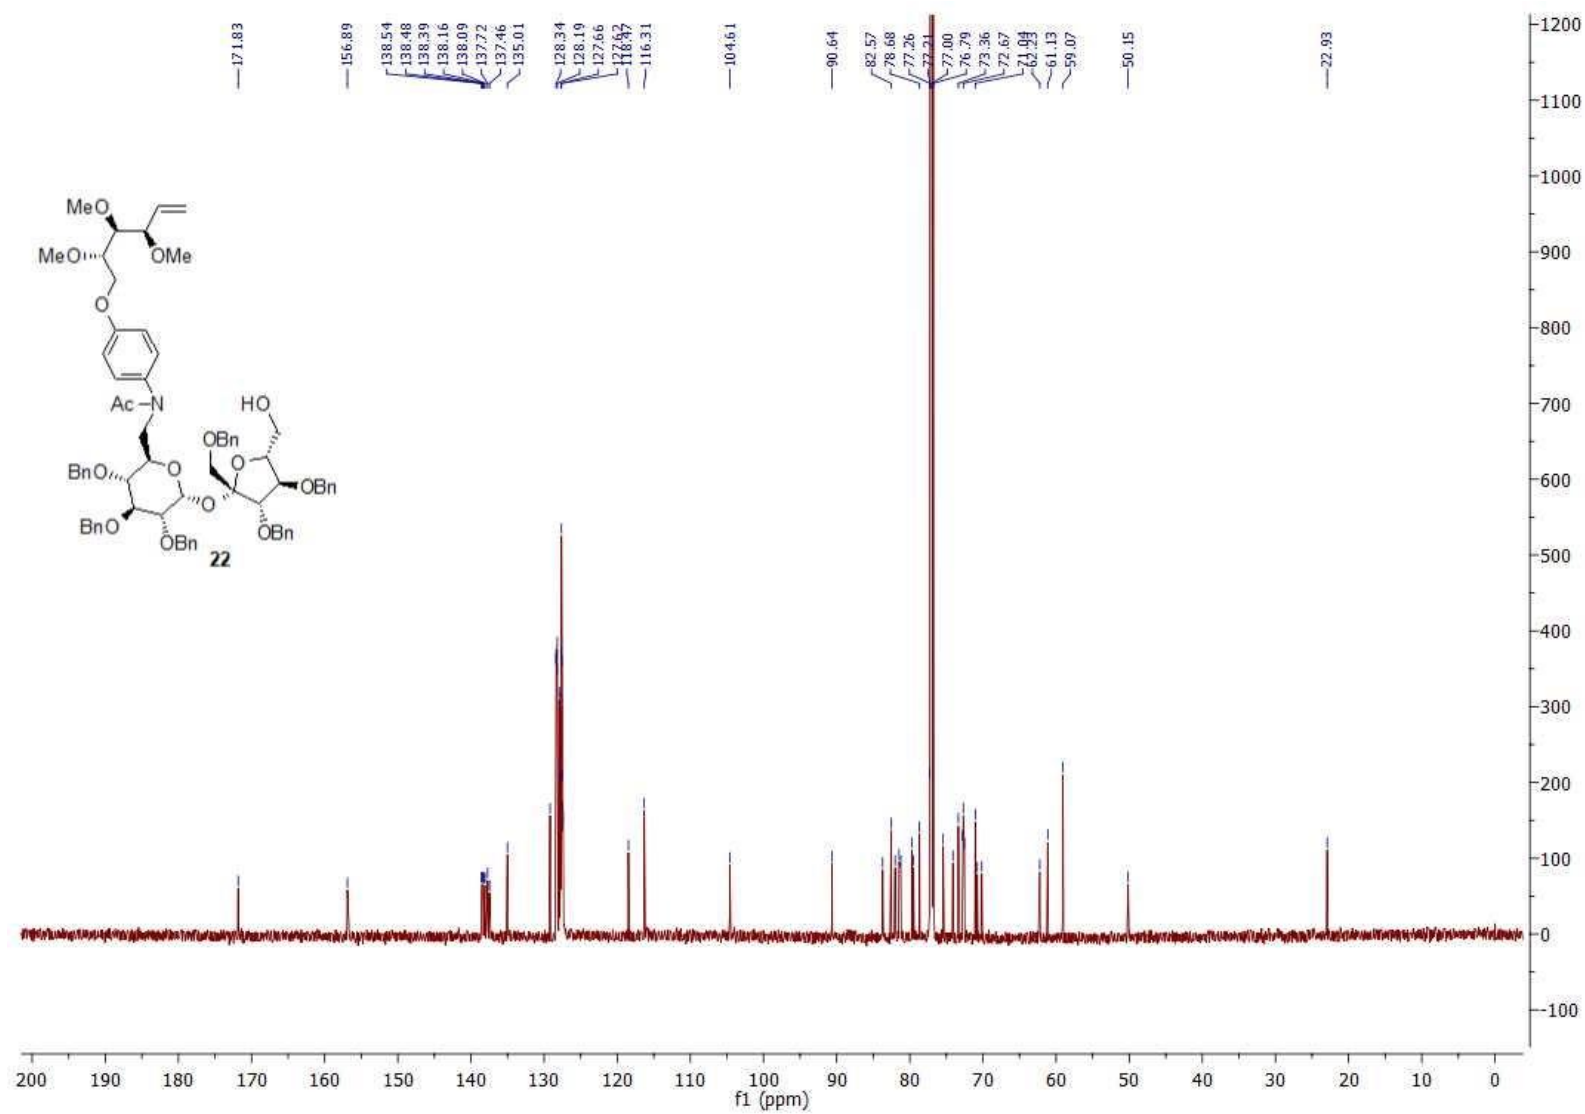

Figure S18  $^{13}\text{C}$  NMR spectrum of compound 22.

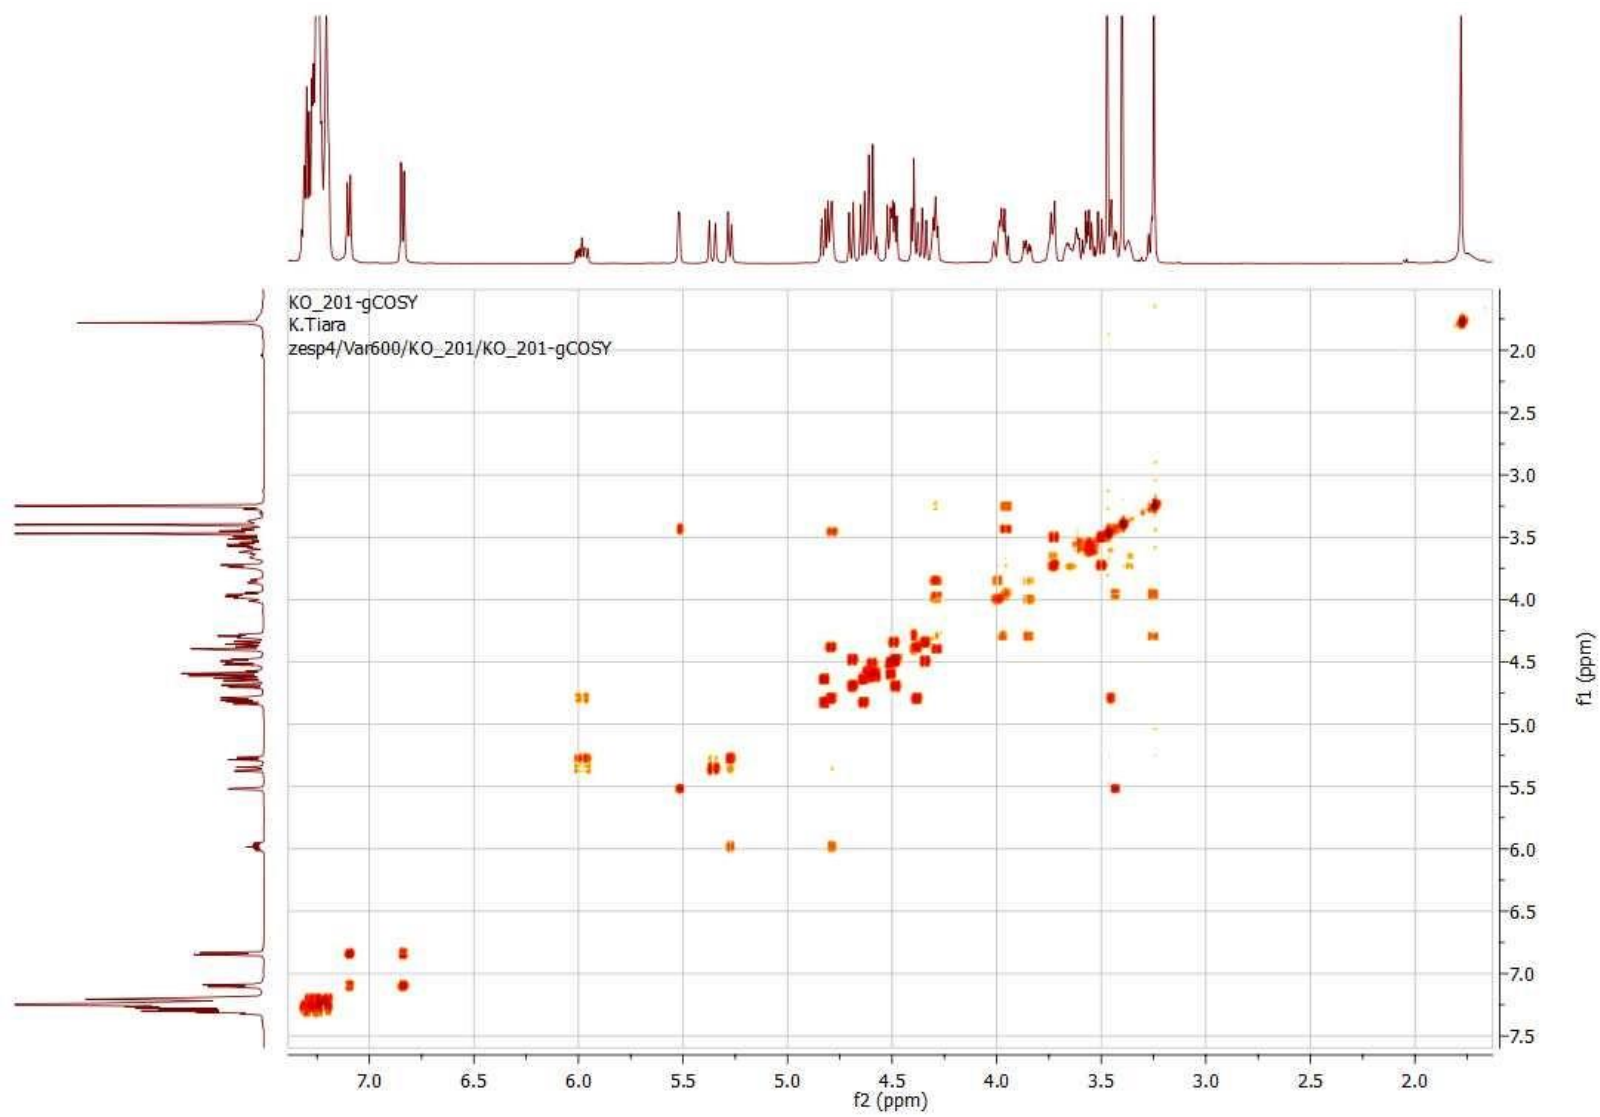

**Figure S19** gCOSY spectrum of compound **22**.

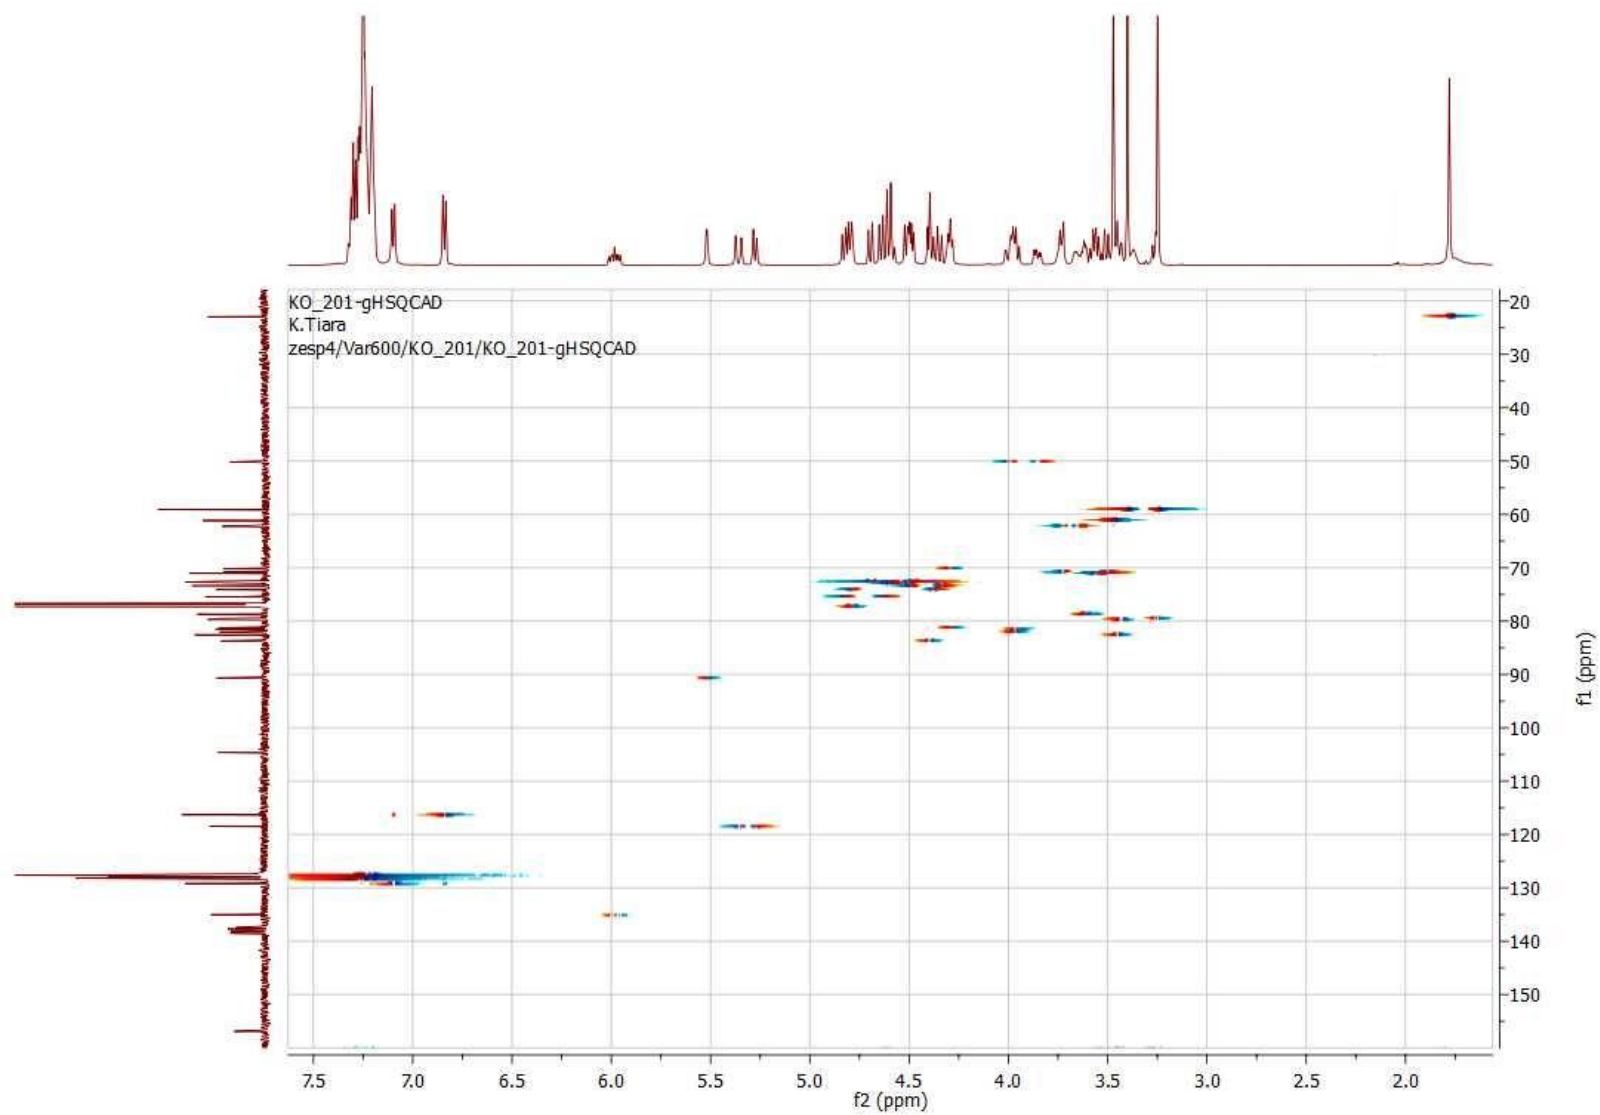

**Figure S20** gHSQCAD spectrum of compound **22**.

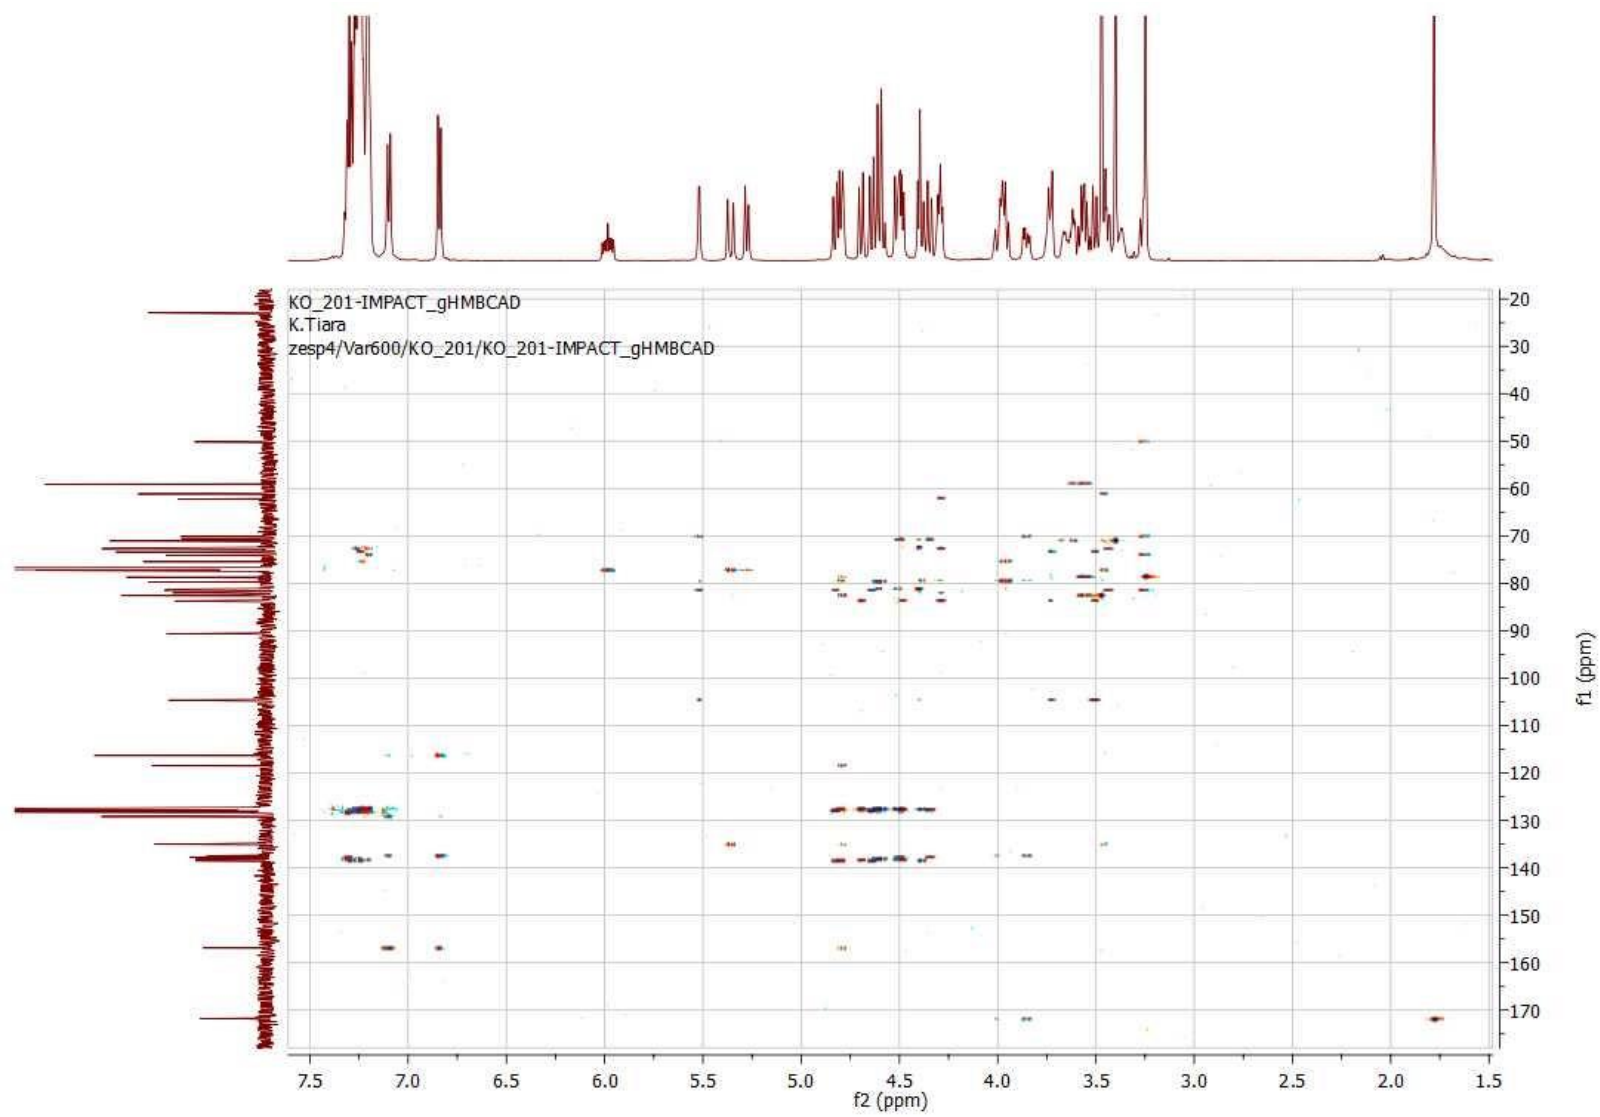

**Figure S21** gHMBCAD spectrum of compound **22**.



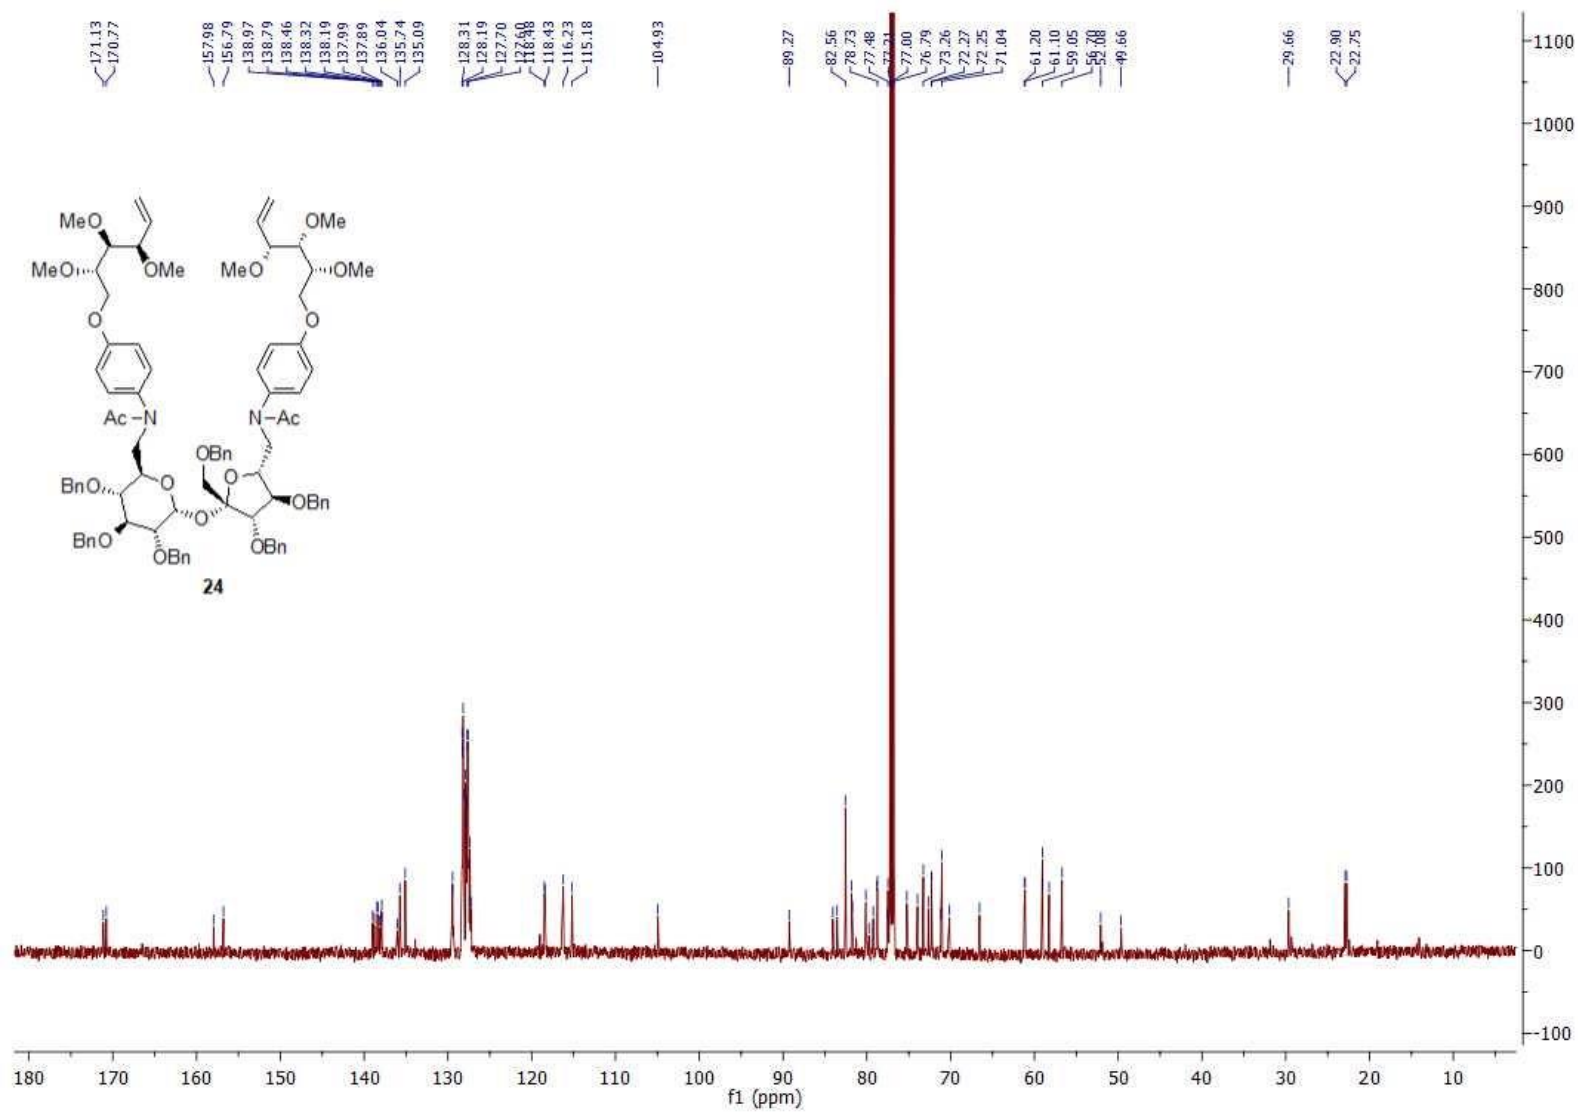

**Figure S23** <sup>13</sup>C NMR spectrum of compound **24**.



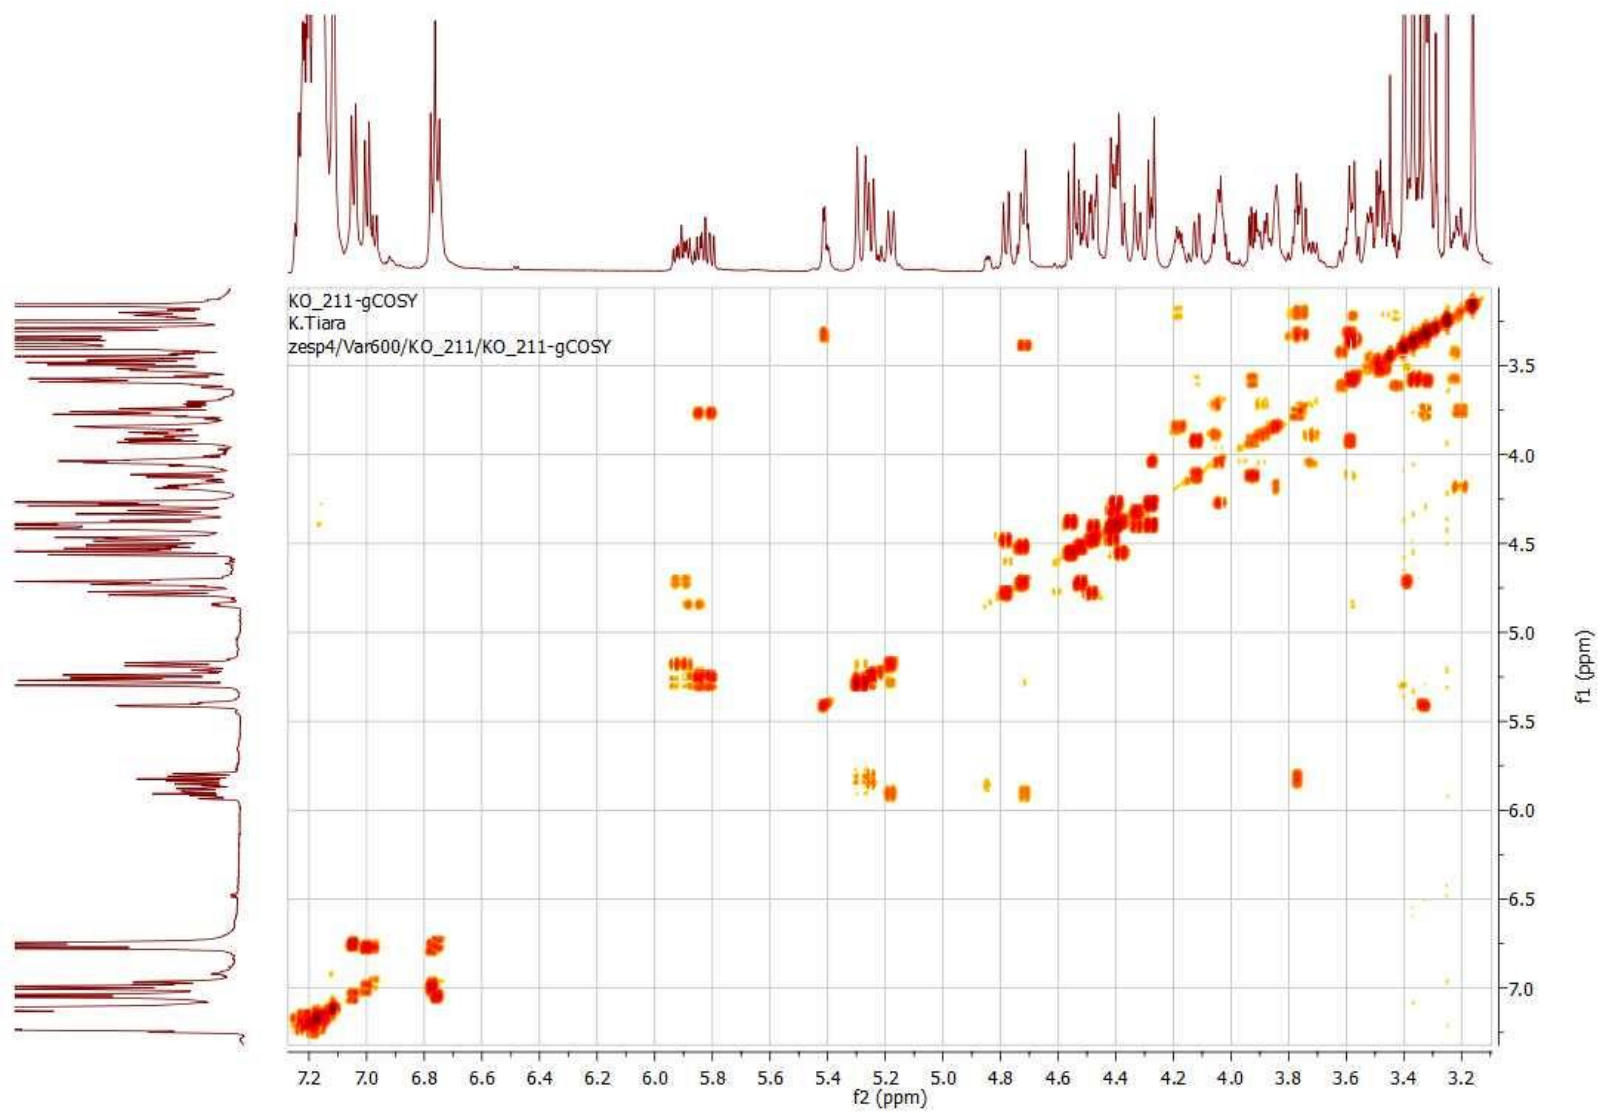

**Figure S24** gCOSY NMR spectrum of compound **24**.

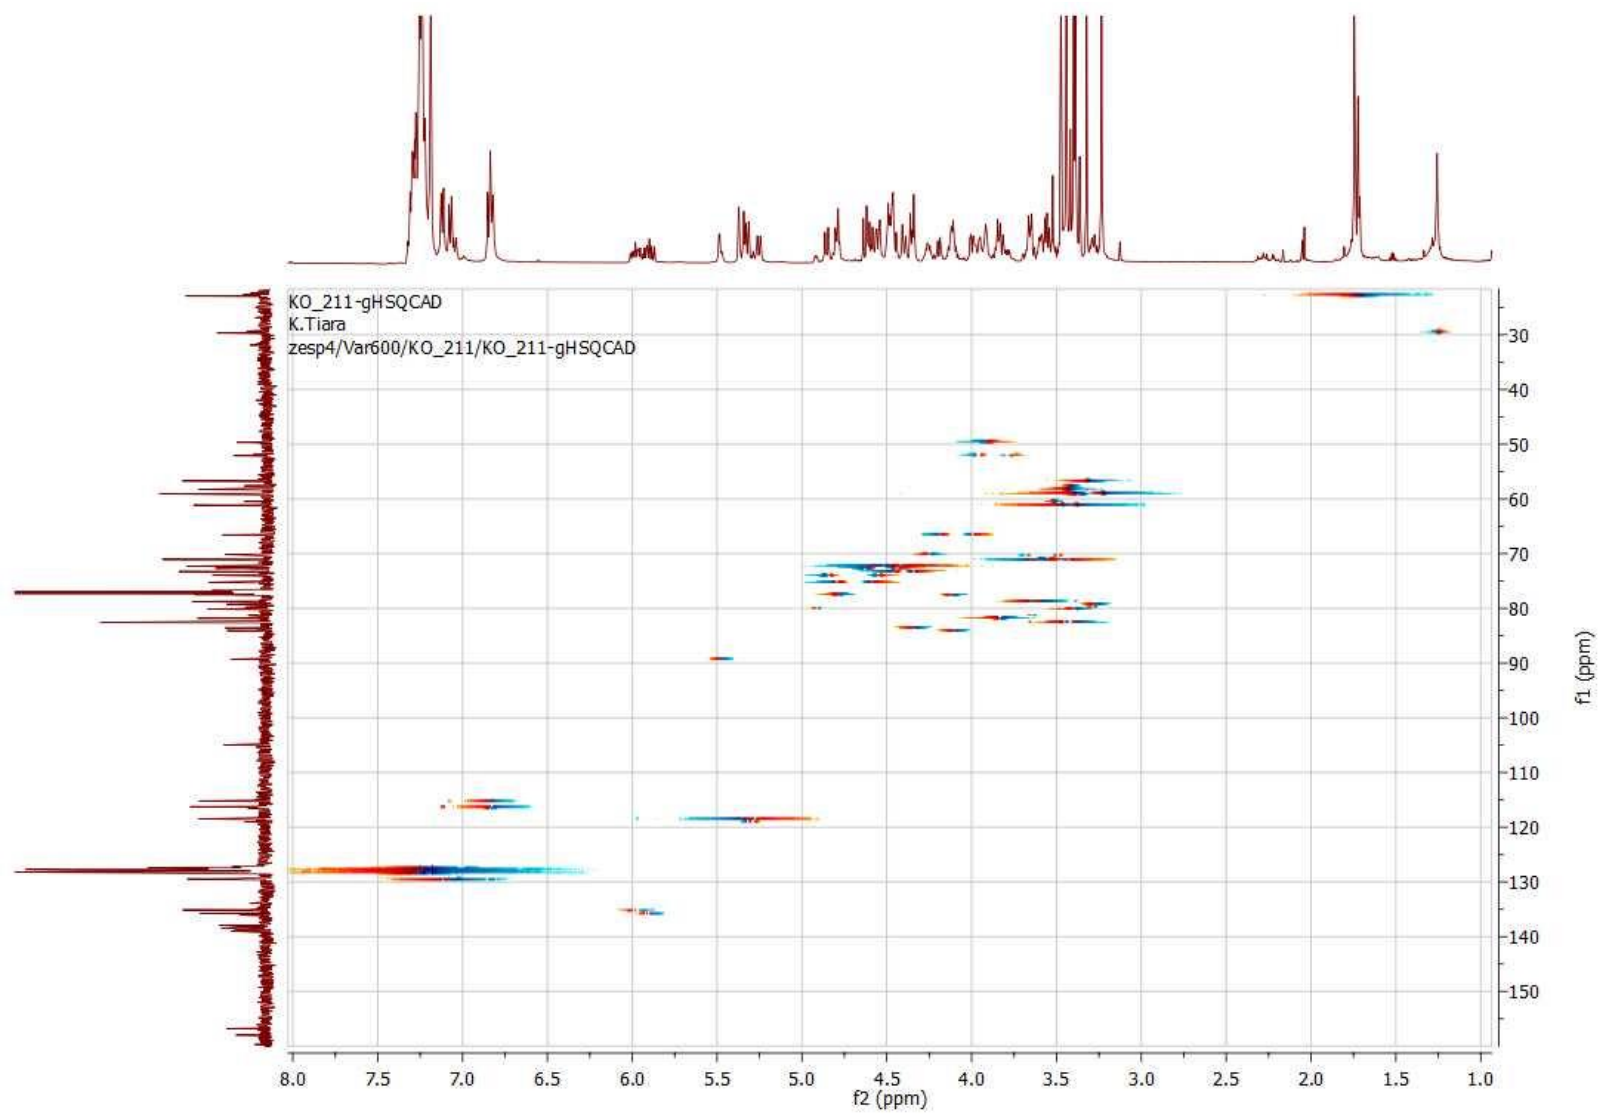

**Figure S25** gHSQCAD NMR spectrum of compound **24**.



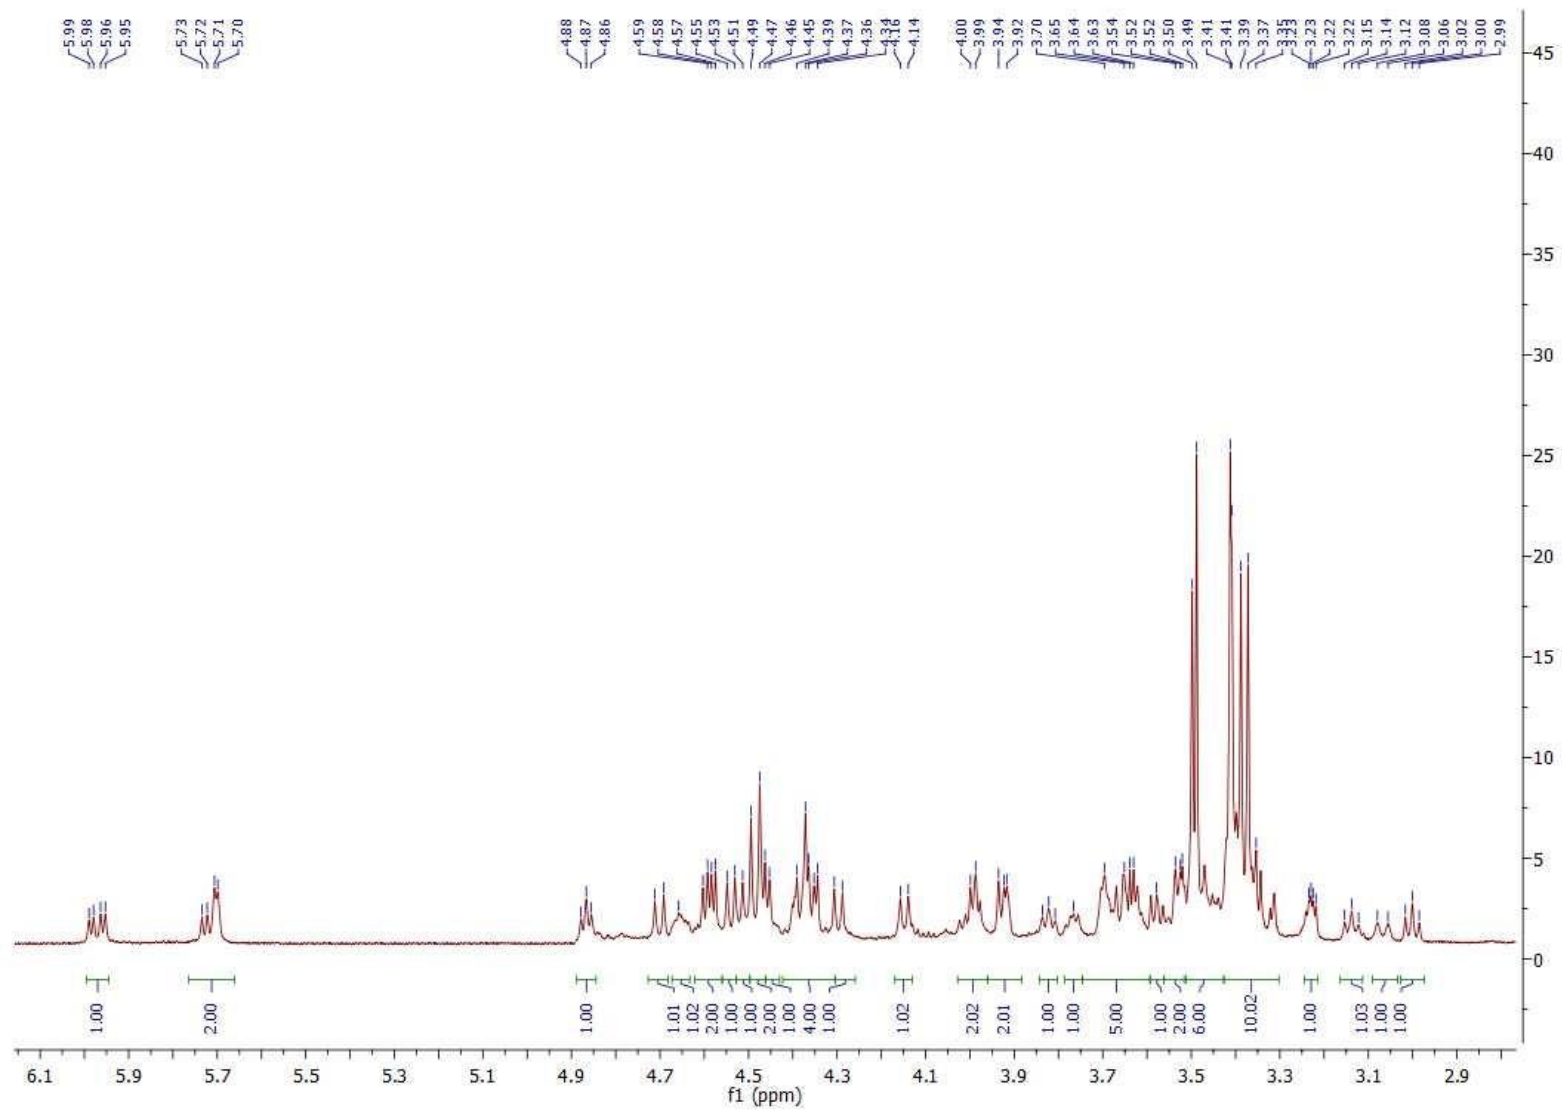

**Figure S27**  $^1\text{H}$  NMR spectrum (aliphatic part) of compound **25**.

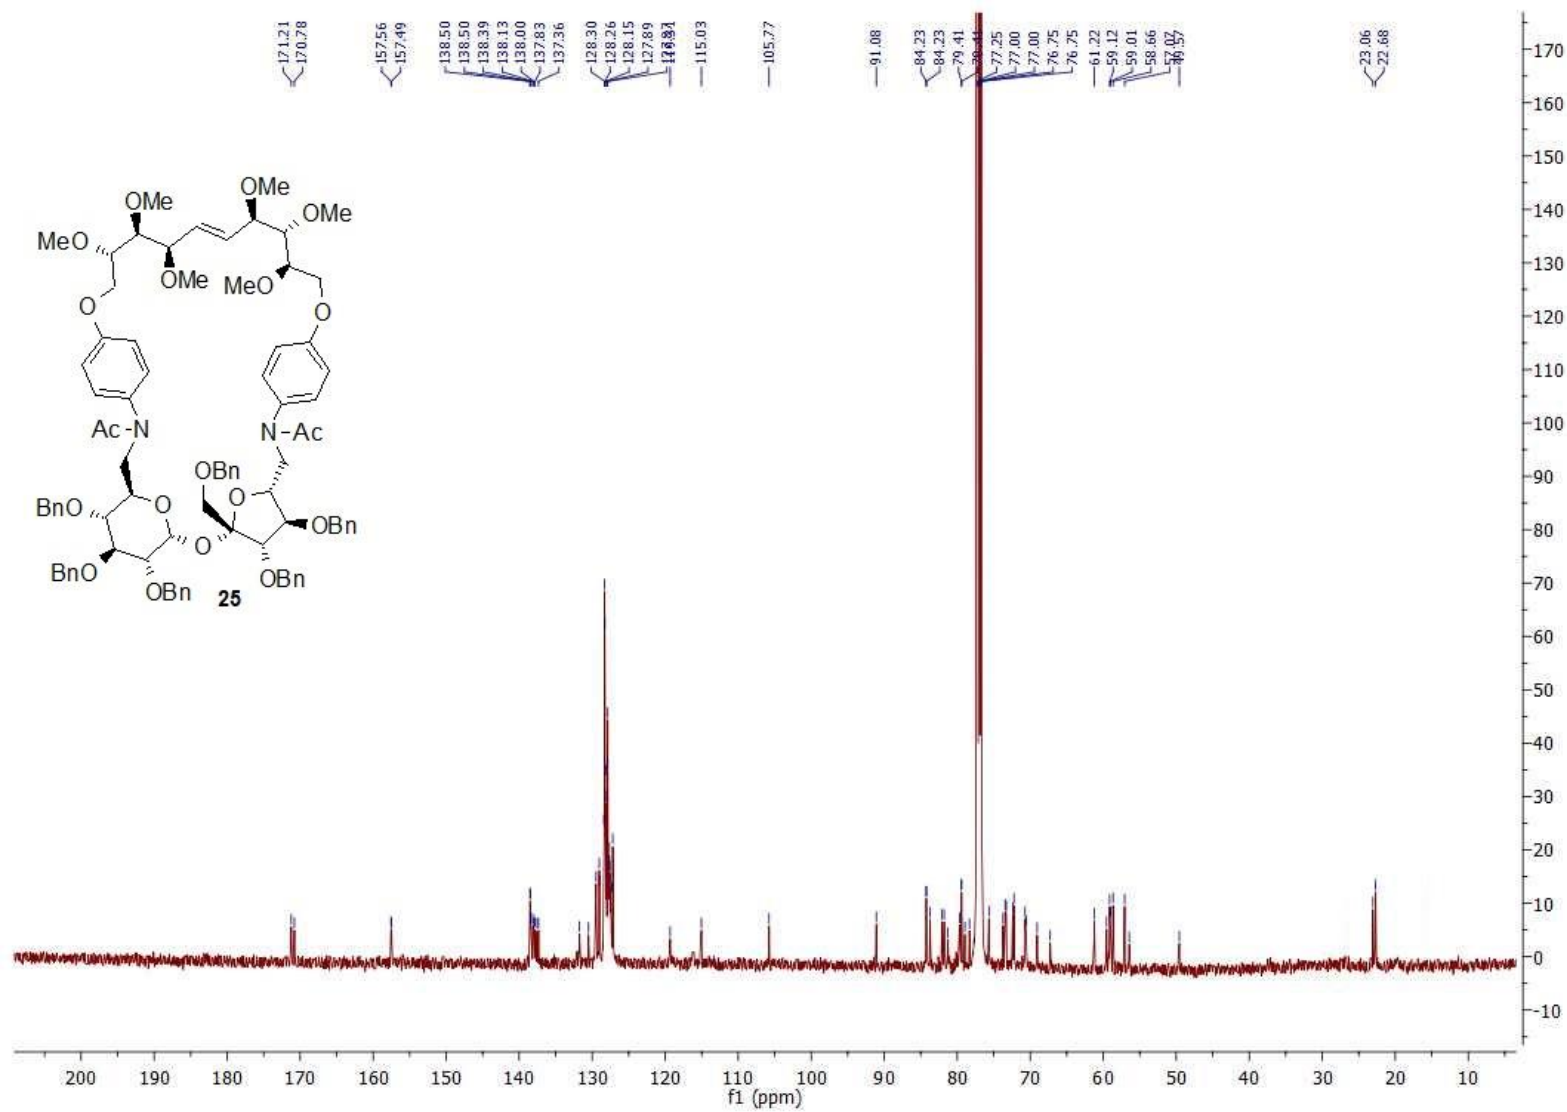

Figure S28 <sup>13</sup>C NMR spectrum of compound **25**.

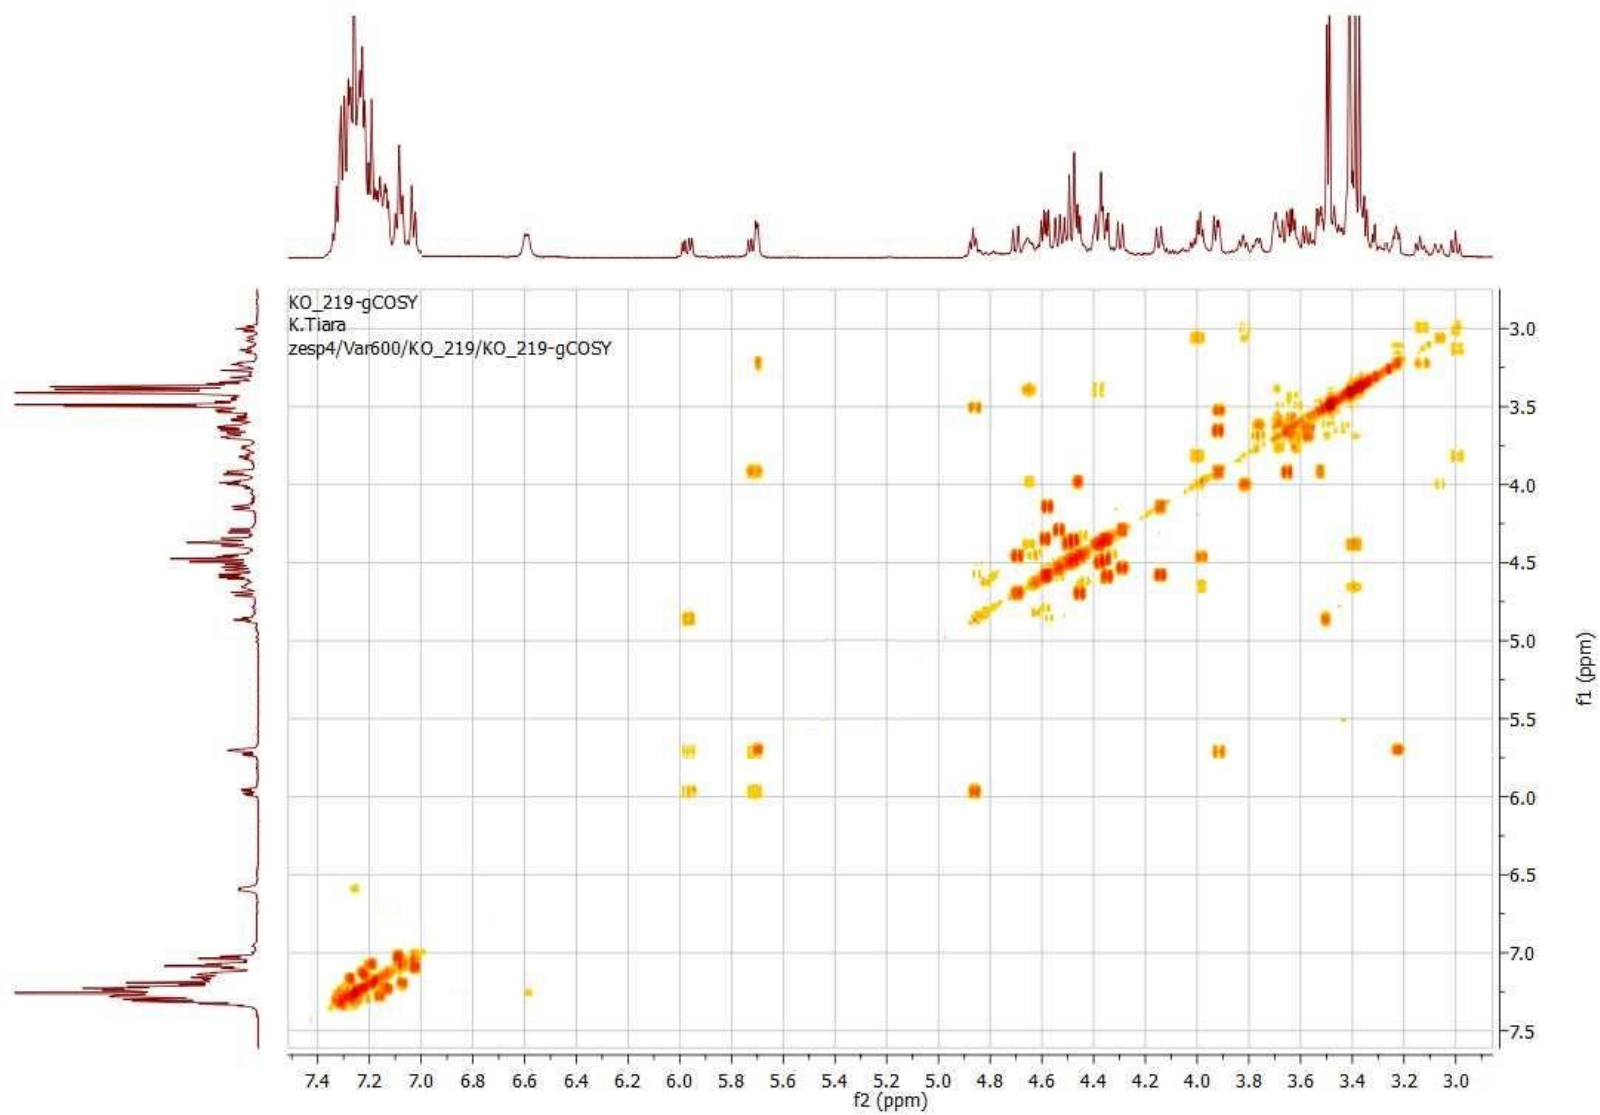

**Figure S29** gCOSY spectrum of compound **25**.

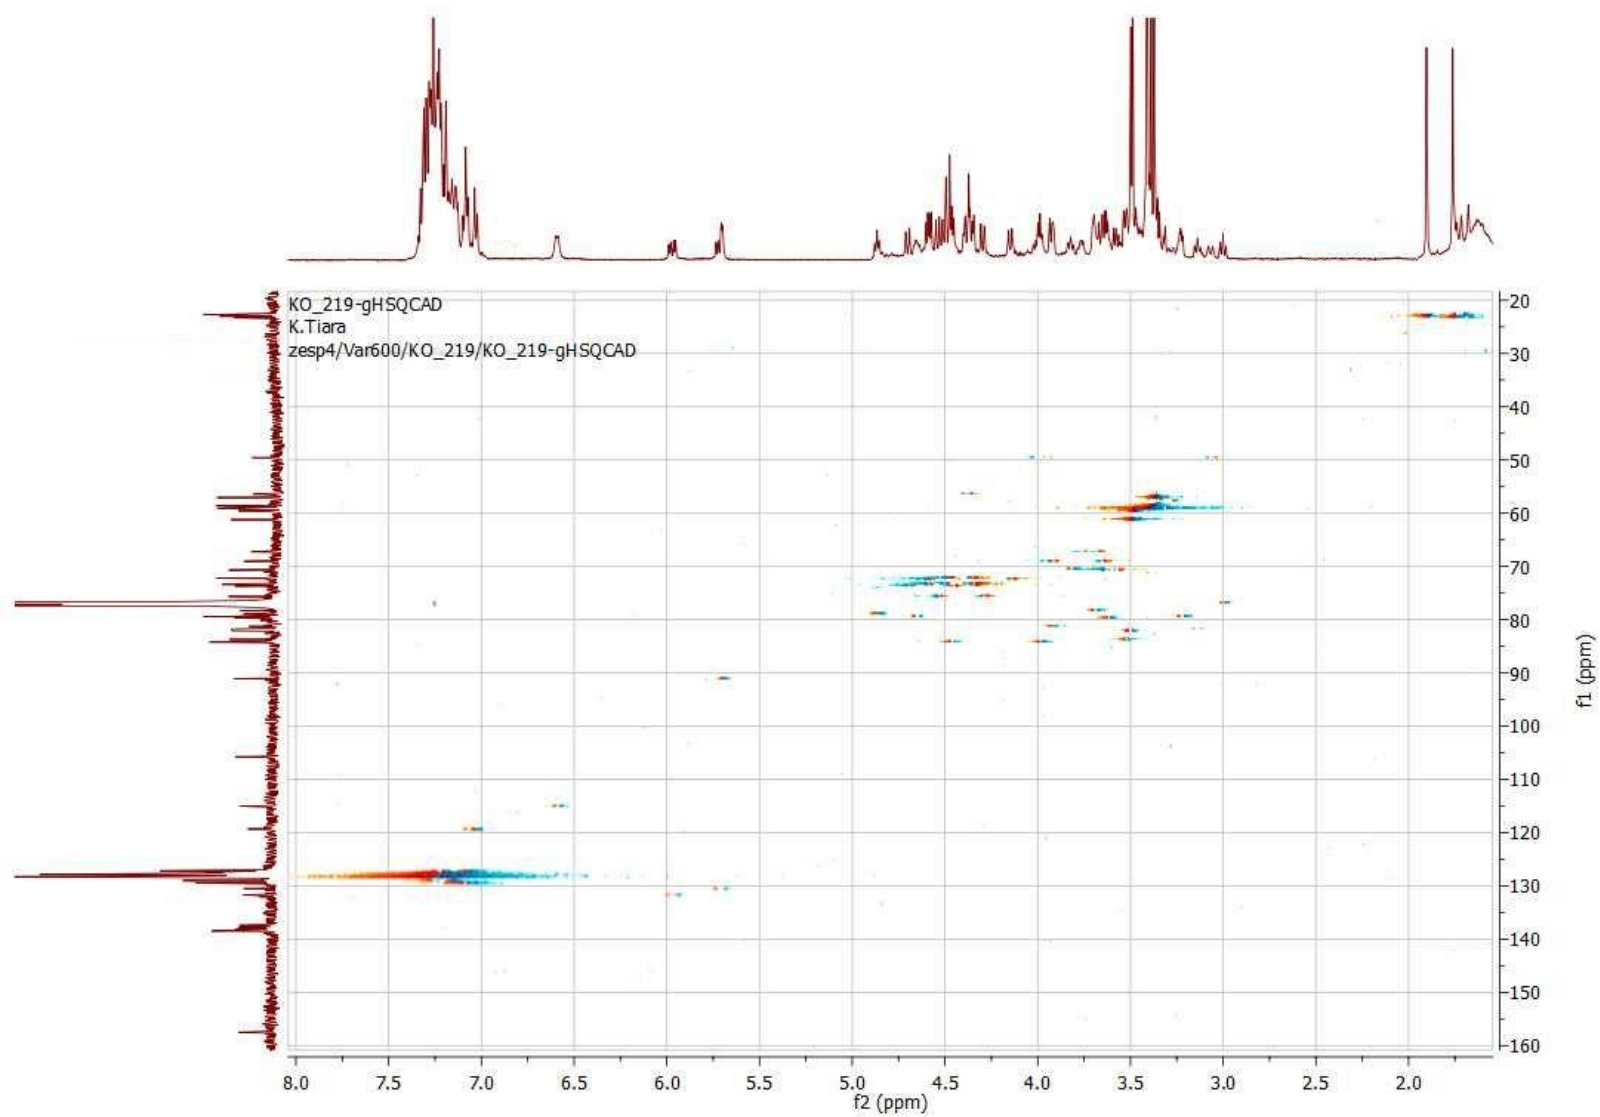

**Figure S30** gHSQCAD spectrum of compound **25**.

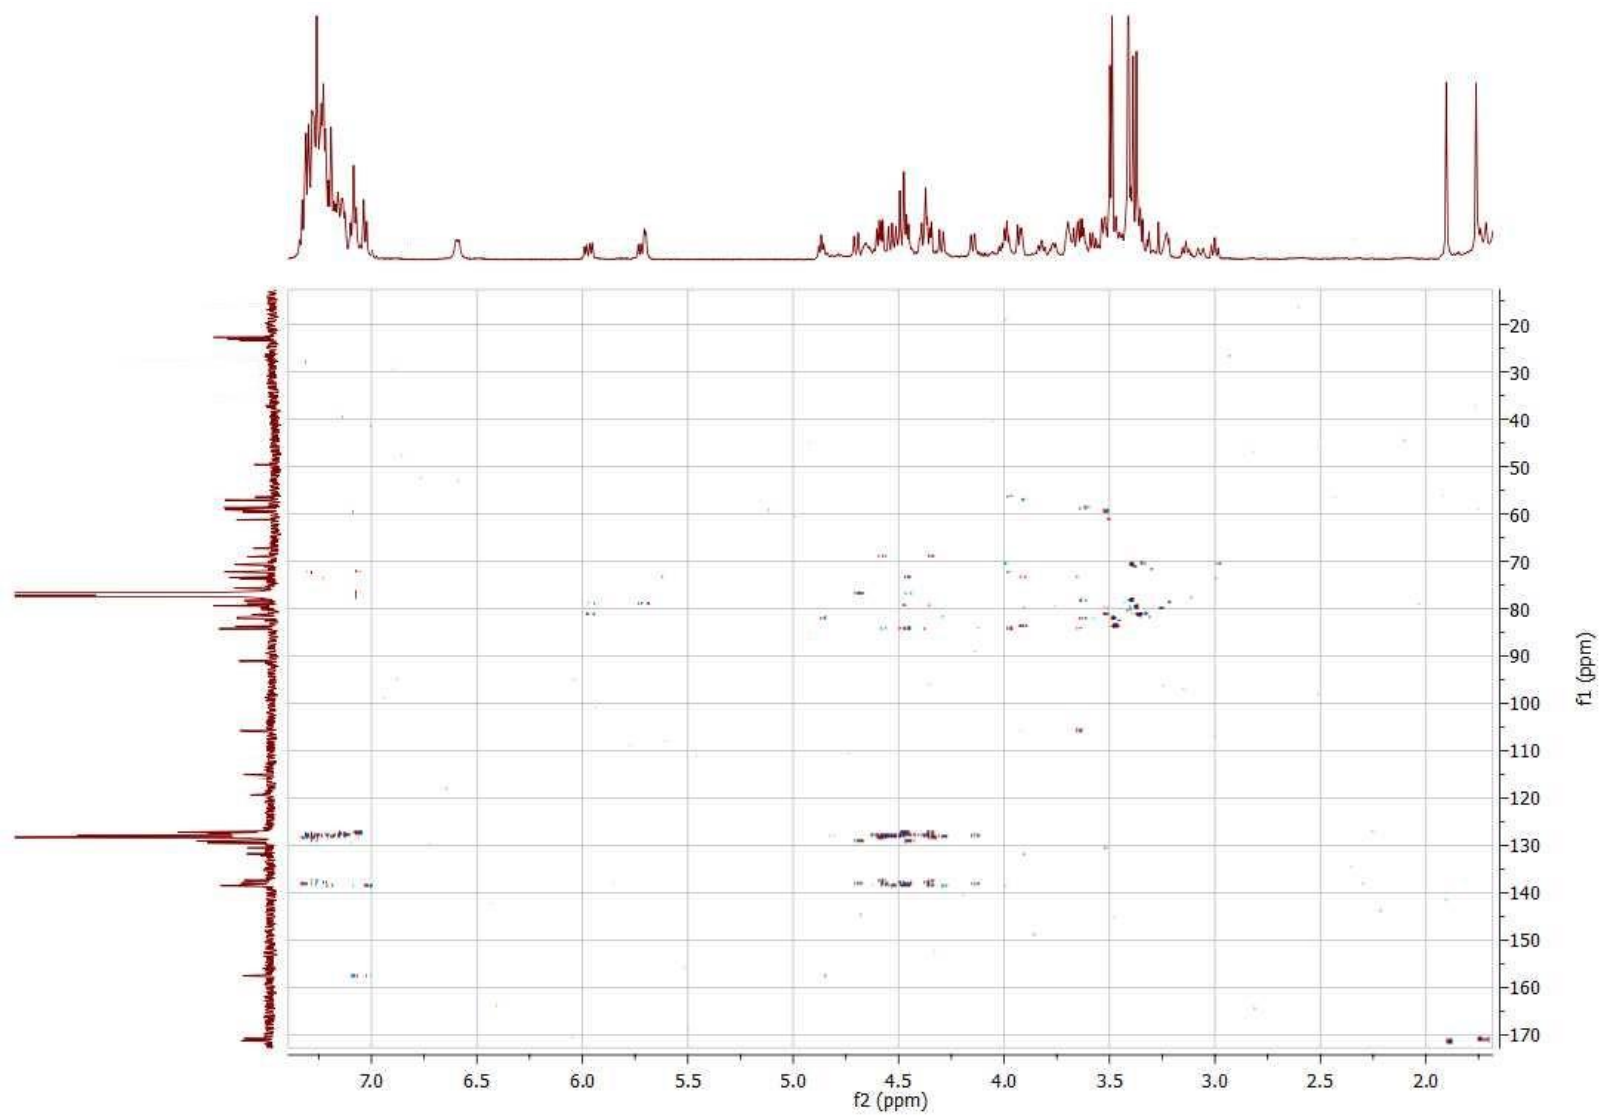

**Figure S31** gHMBCAD NMR spectrum of compound **25**.
